# Supplementary material for: Evaluating Simplifications of Subsurface Process Representations for Field-scale Permafrost Hydrology Models
Source: Copernicus journal article supplement (doi:10.5194/tc-2021-362), 2022-01-04
Supplement: Supplementary file 2 [file tc-2021-362-supplement.zip]

Archive with 48 entries (45 files):
- Supplement/.DS_Store
- Supplement/Barrow/
- Supplement/Barrow/.DS_Store
- Supplement/Barrow/advection_column_barrow.png
- Supplement/Barrow/advection_north_convergent_barrow.png
- Supplement/Barrow/advection_north_divergent_barrow.png
- Supplement/Barrow/advection_south_convergent_barrow.png
- Supplement/Barrow/advection_south_divergent_barrow.png
- Supplement/Barrow/cryosuction_north_convergent_barrow.png
- Supplement/Barrow/cryosuction_north_divergent_barrow.png
- Supplement/Barrow/cryosuction_south_convergent_barrow.png
- Supplement/Barrow/cryosuction_south_divergent_barrow.png
- Supplement/Barrow/density_column_barrow.png
- Supplement/Barrow/density_north_convergent_barrow.png
- Supplement/Barrow/density_north_divergent_barrow.png
- Supplement/Barrow/density_south_convergent_barrow.png
- Supplement/Barrow/density_south_divergent_barrow.png
- Supplement/Sag/
- Supplement/Sag/.DS_Store
- Supplement/Sag/advection_column_sag.png
- Supplement/Sag/advection_north_convergent_sag.png
- Supplement/Sag/advection_north_divergent_sag.png
- Supplement/Sag/advection_south_convergent_sag.png
- Supplement/Sag/advection_south_divergent_sag.png
- Supplement/Sag/cryosuction_north_convergent_sag.png
- Supplement/Sag/cryosuction_north_divergent_sag.png
- Supplement/Sag/cryosuction_south_convergent_sag.png
- Supplement/Sag/cryosuction_south_divergent_sag.png
- Supplement/Sag/density_north_convergent_sag.png
- Supplement/Sag/density_north_divergent_sag.png
- Supplement/Sag/density_south_convergent_sag.png
- Supplement/Sag/density_south_divergent_sag.png
- Supplement/Supplement_specification.pdf
- Supplement/Teller/
- Supplement/Teller/advection_column_teller.png
- Supplement/Teller/advection_north_convergent_teller.png
- Supplement/Teller/advection_north_divergent_teller.png
- Supplement/Teller/advection_south_convergent_teller.png
- Supplement/Teller/advection_south_divergent_teller.png
- Supplement/Teller/cryosuction_north_convergent_teller.png
- Supplement/Teller/cryosuction_north_divergent_teller.png
- Supplement/Teller/cryosuction_south_convergent_teller.png
- Supplement/Teller/cryosuction_south_divergent_teller.png
- Supplement/Teller/density_column_teller.png
- Supplement/Teller/density_north_convergent_teller.png
- Supplement/Teller/density_north_divergent_teller.png
- Supplement/Teller/density_south_convergent_teller.png
- Supplement/Teller/density_south_divergent_teller.png
