# Supplementary figures and images for: Evaluating Simplifications of Subsurface Process Representations for Field-scale Permafrost Hydrology Models
Source: Copernicus journal article supplement (doi:10.5194/tc-2021-362), 2022-01-04

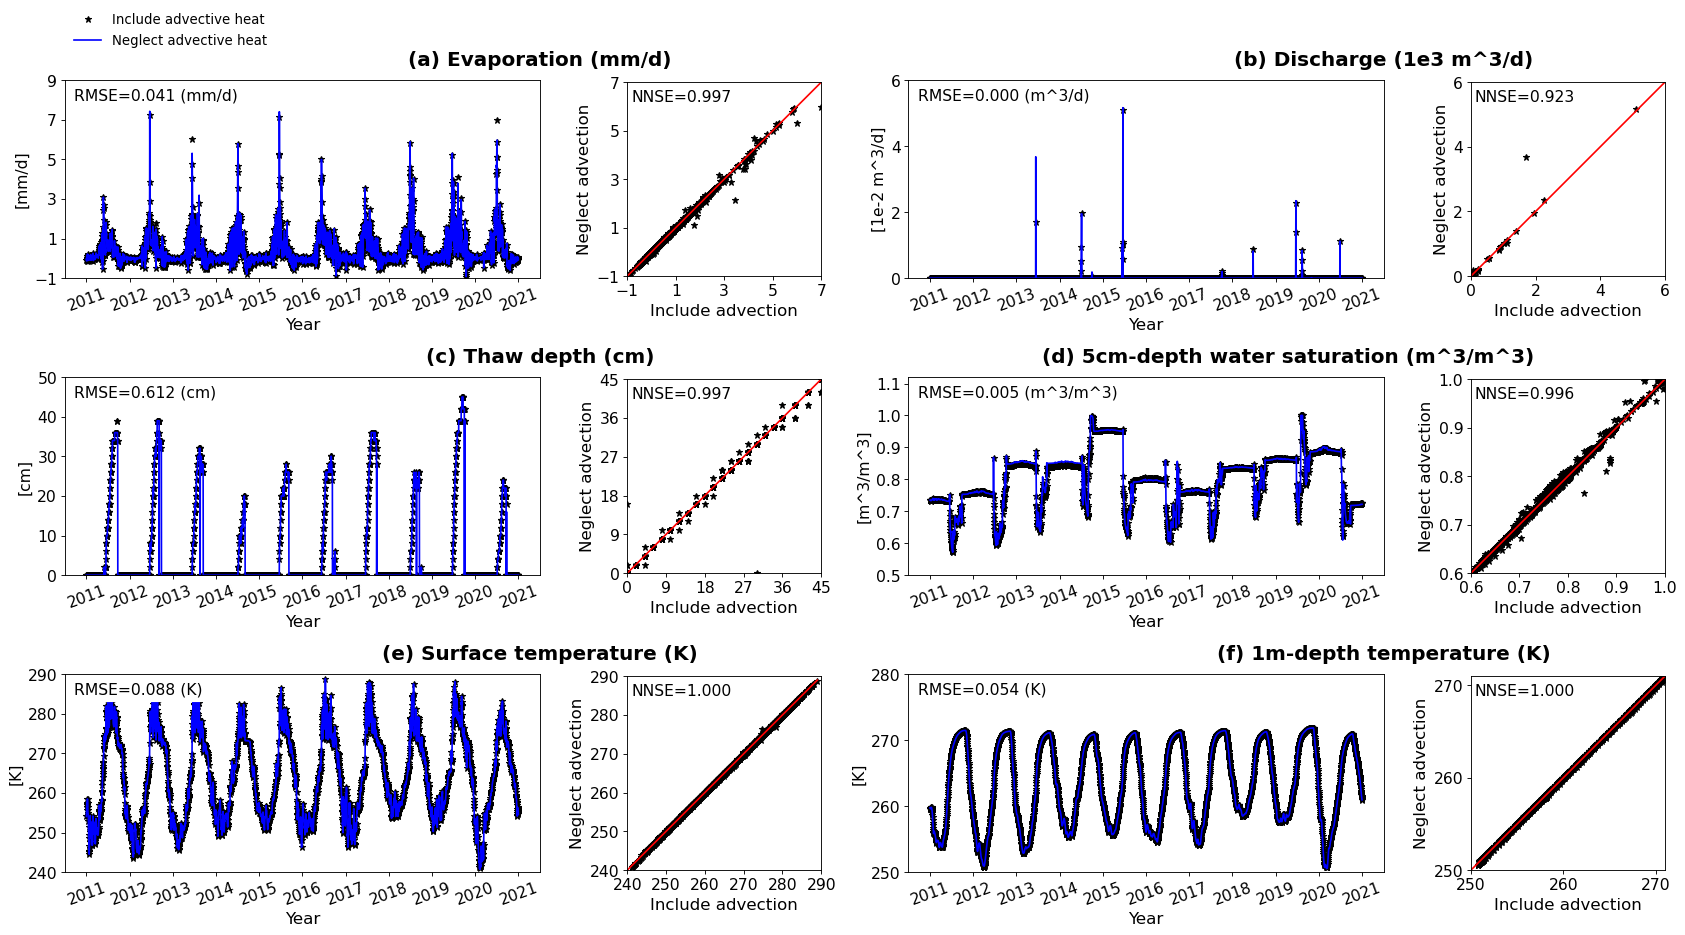

Supplement: Supplementary file 2 [file tc-2021-362-supplement.zip › Supplement/Barrow/advection_column_barrow.png]

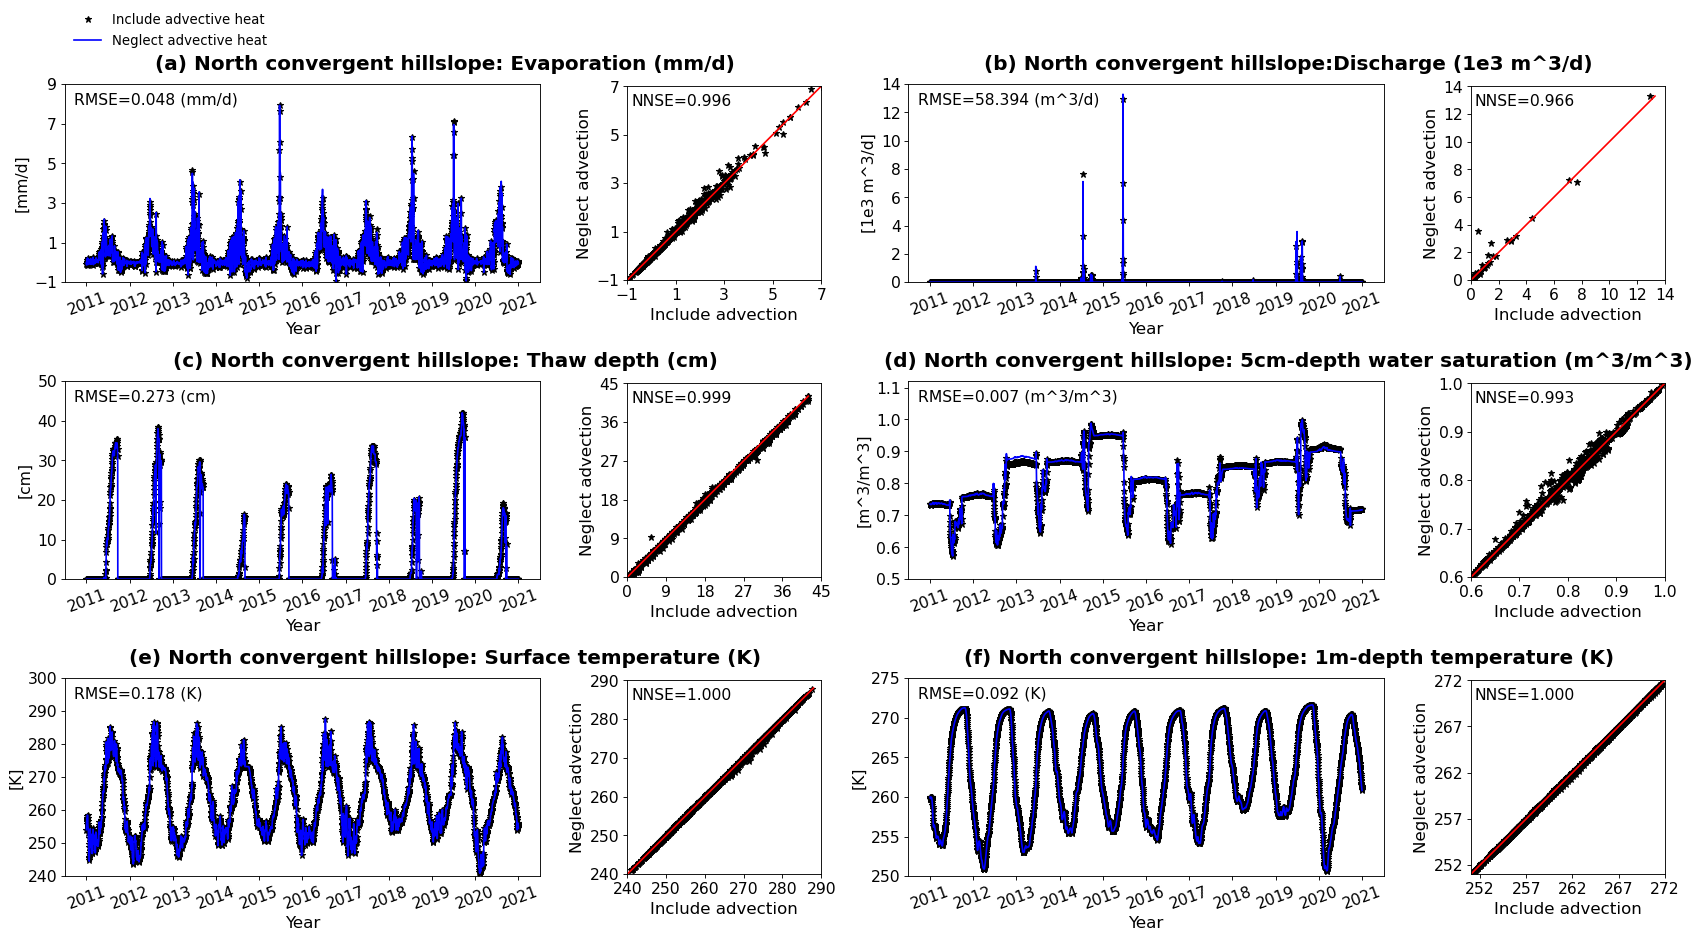

Supplement: Supplementary file 2 [file tc-2021-362-supplement.zip › Supplement/Barrow/advection_north_convergent_barrow.png]

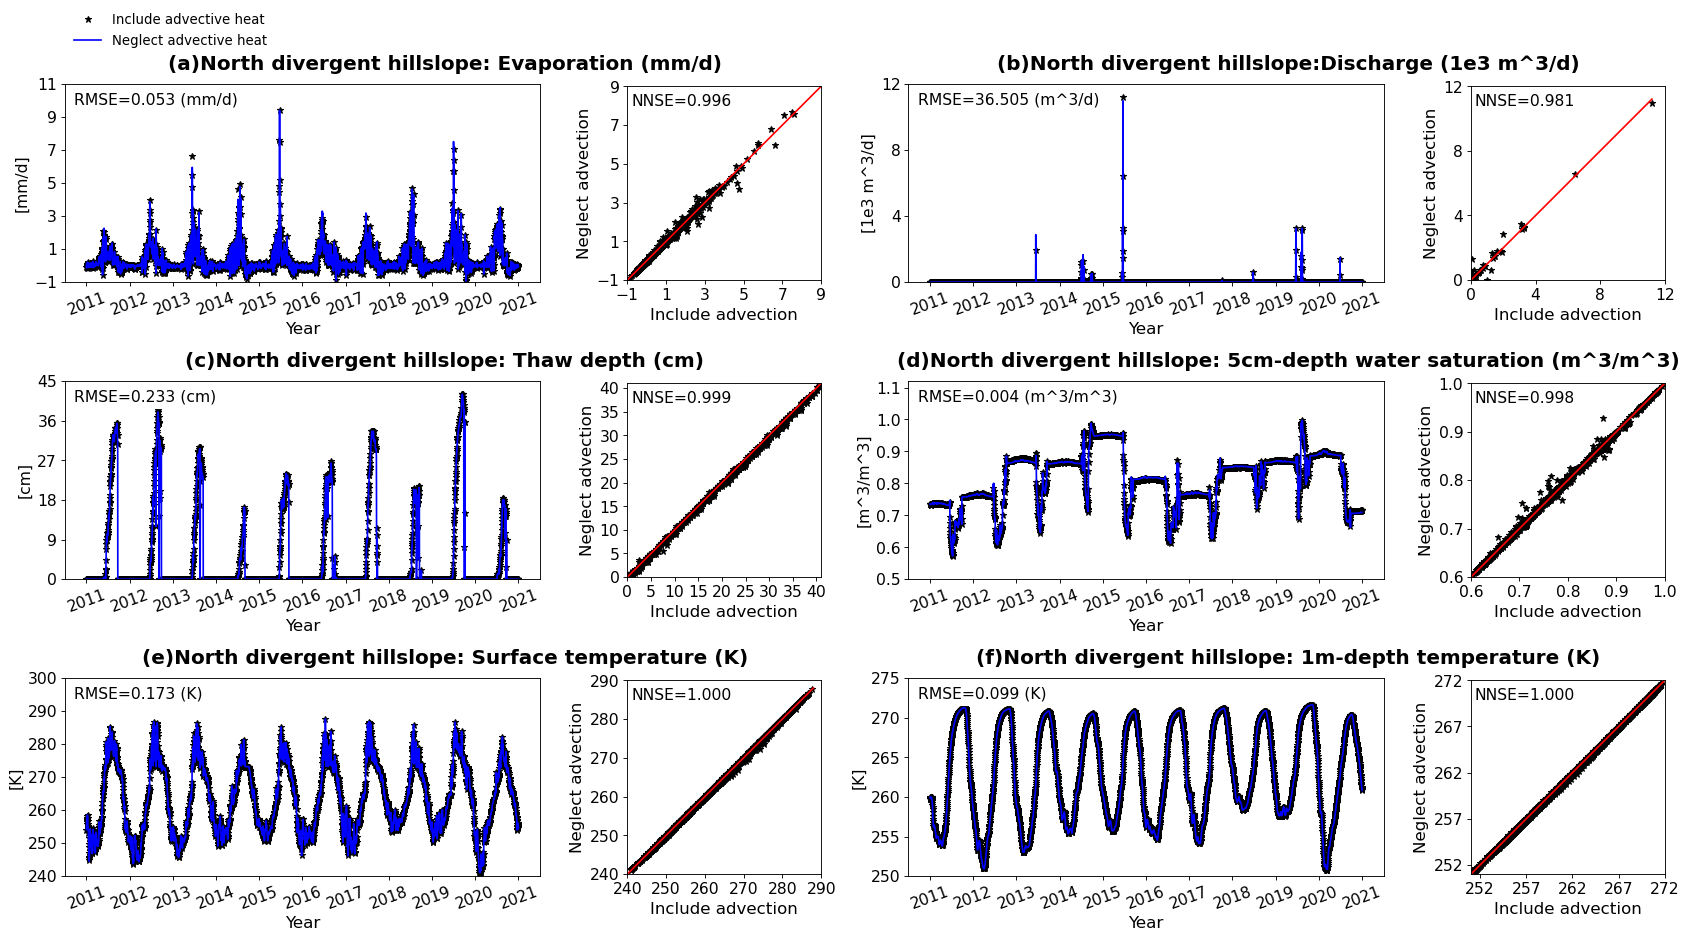

Supplement: Supplementary file 2 [file tc-2021-362-supplement.zip › Supplement/Barrow/advection_north_divergent_barrow.png]

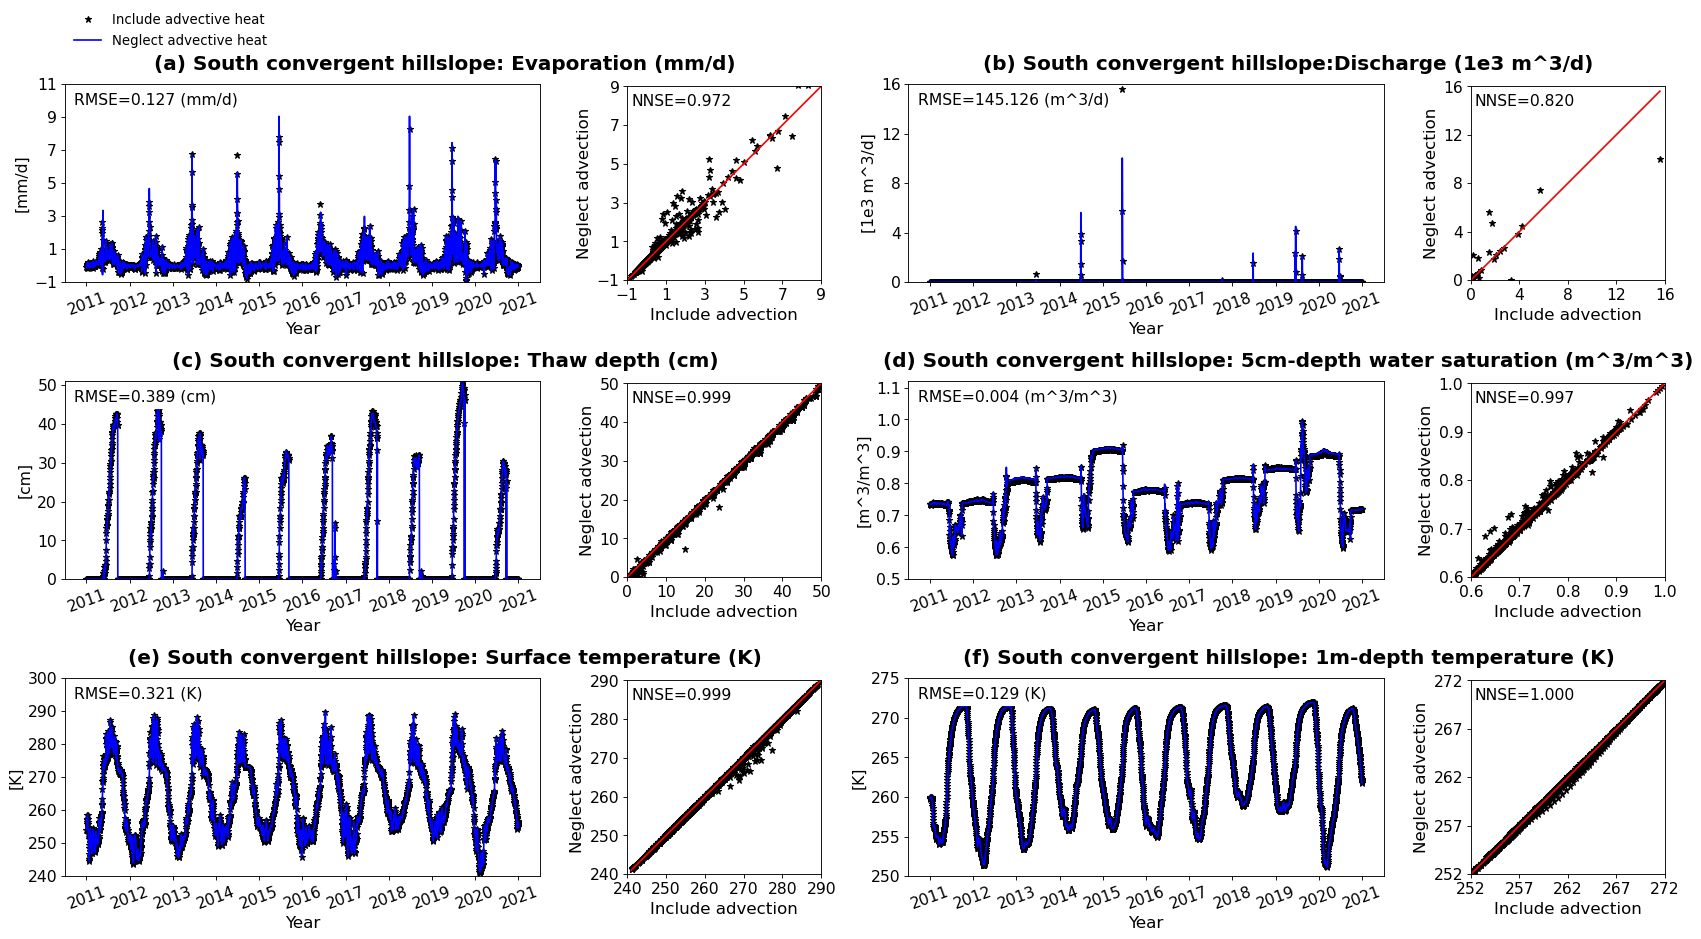

Supplement: Supplementary file 2 [file tc-2021-362-supplement.zip › Supplement/Barrow/advection_south_convergent_barrow.png]

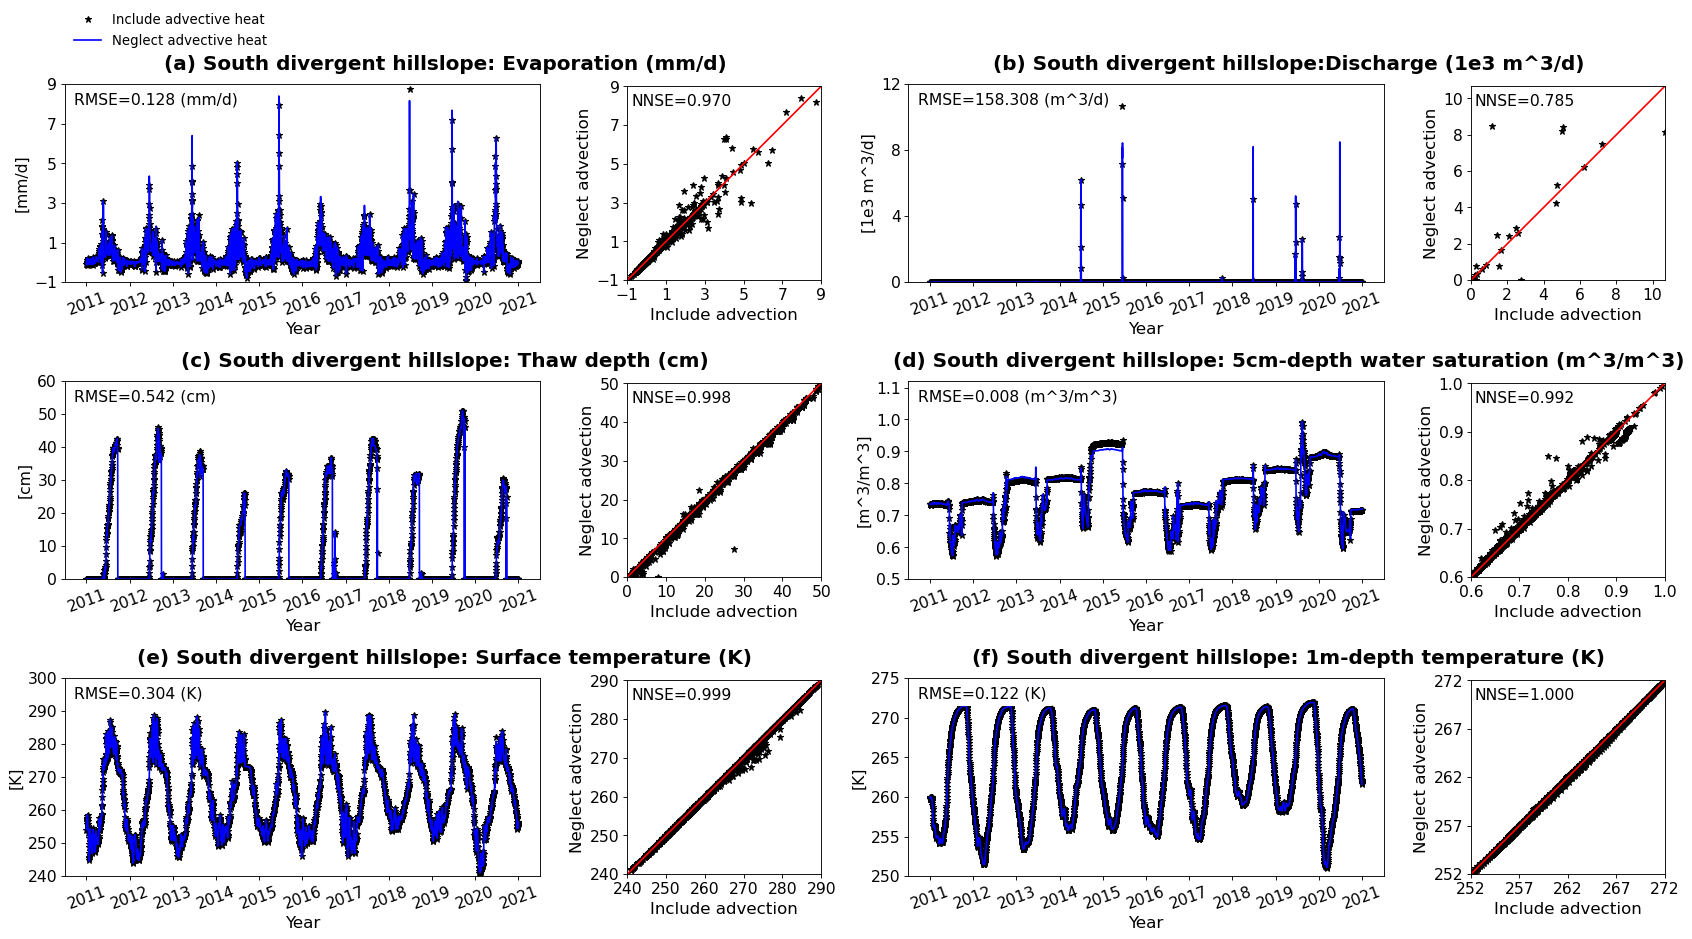

Supplement: Supplementary file 2 [file tc-2021-362-supplement.zip › Supplement/Barrow/advection_south_divergent_barrow.png]

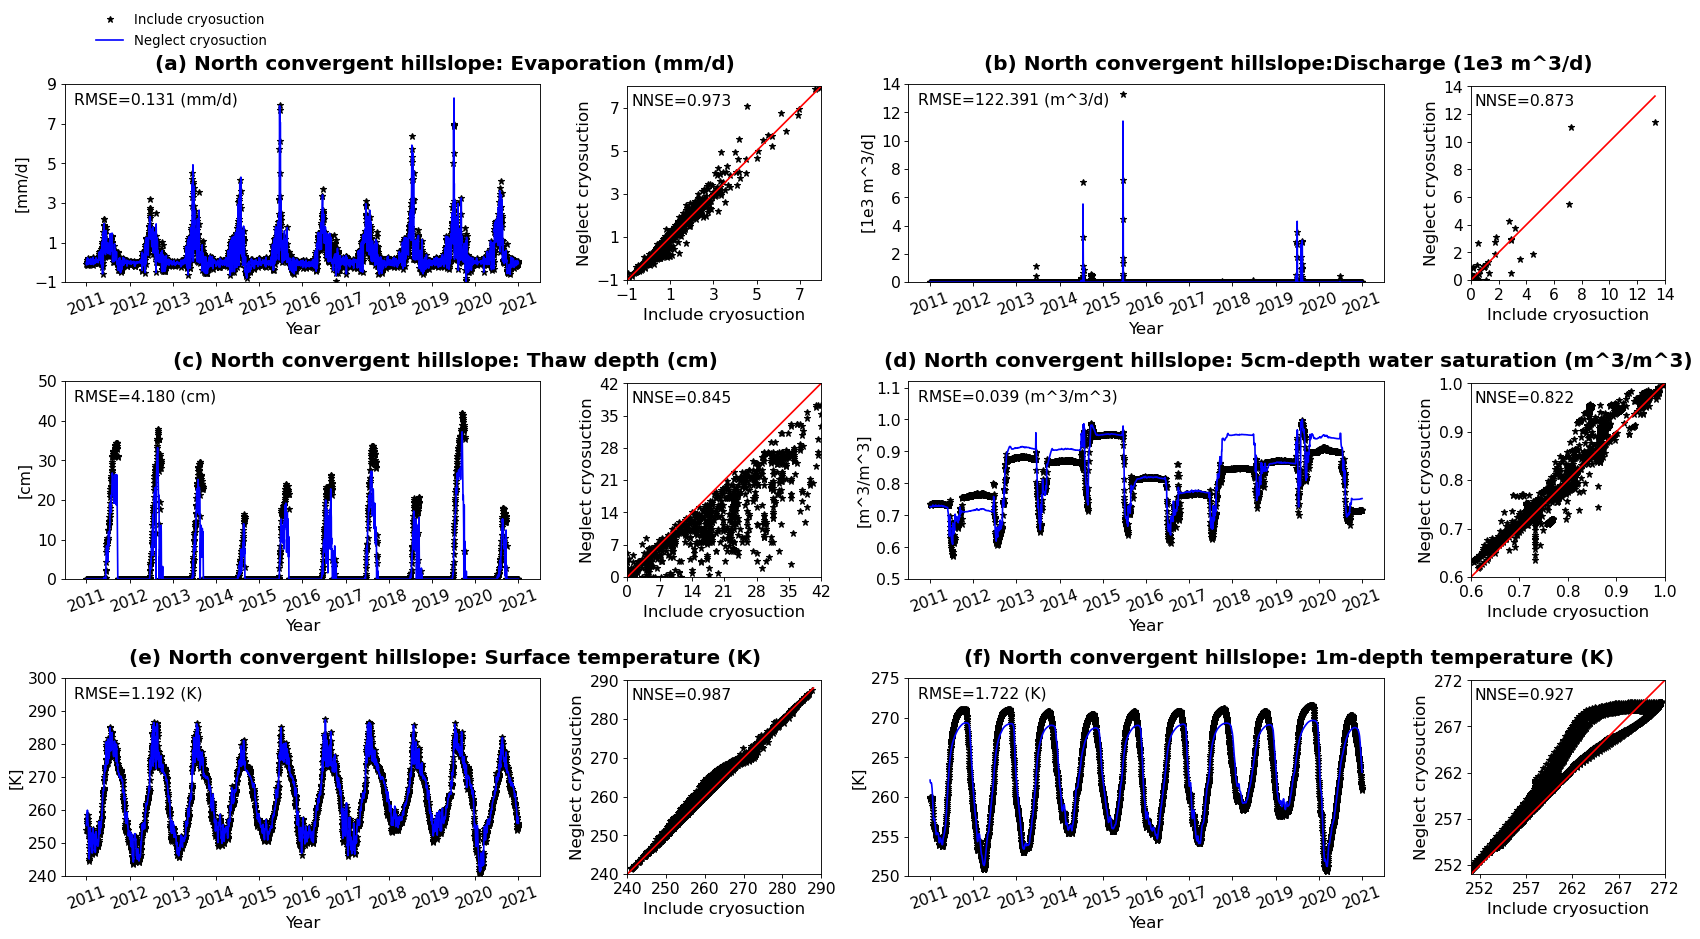

Supplement: Supplementary file 2 [file tc-2021-362-supplement.zip › Supplement/Barrow/cryosuction_north_convergent_barrow.png]

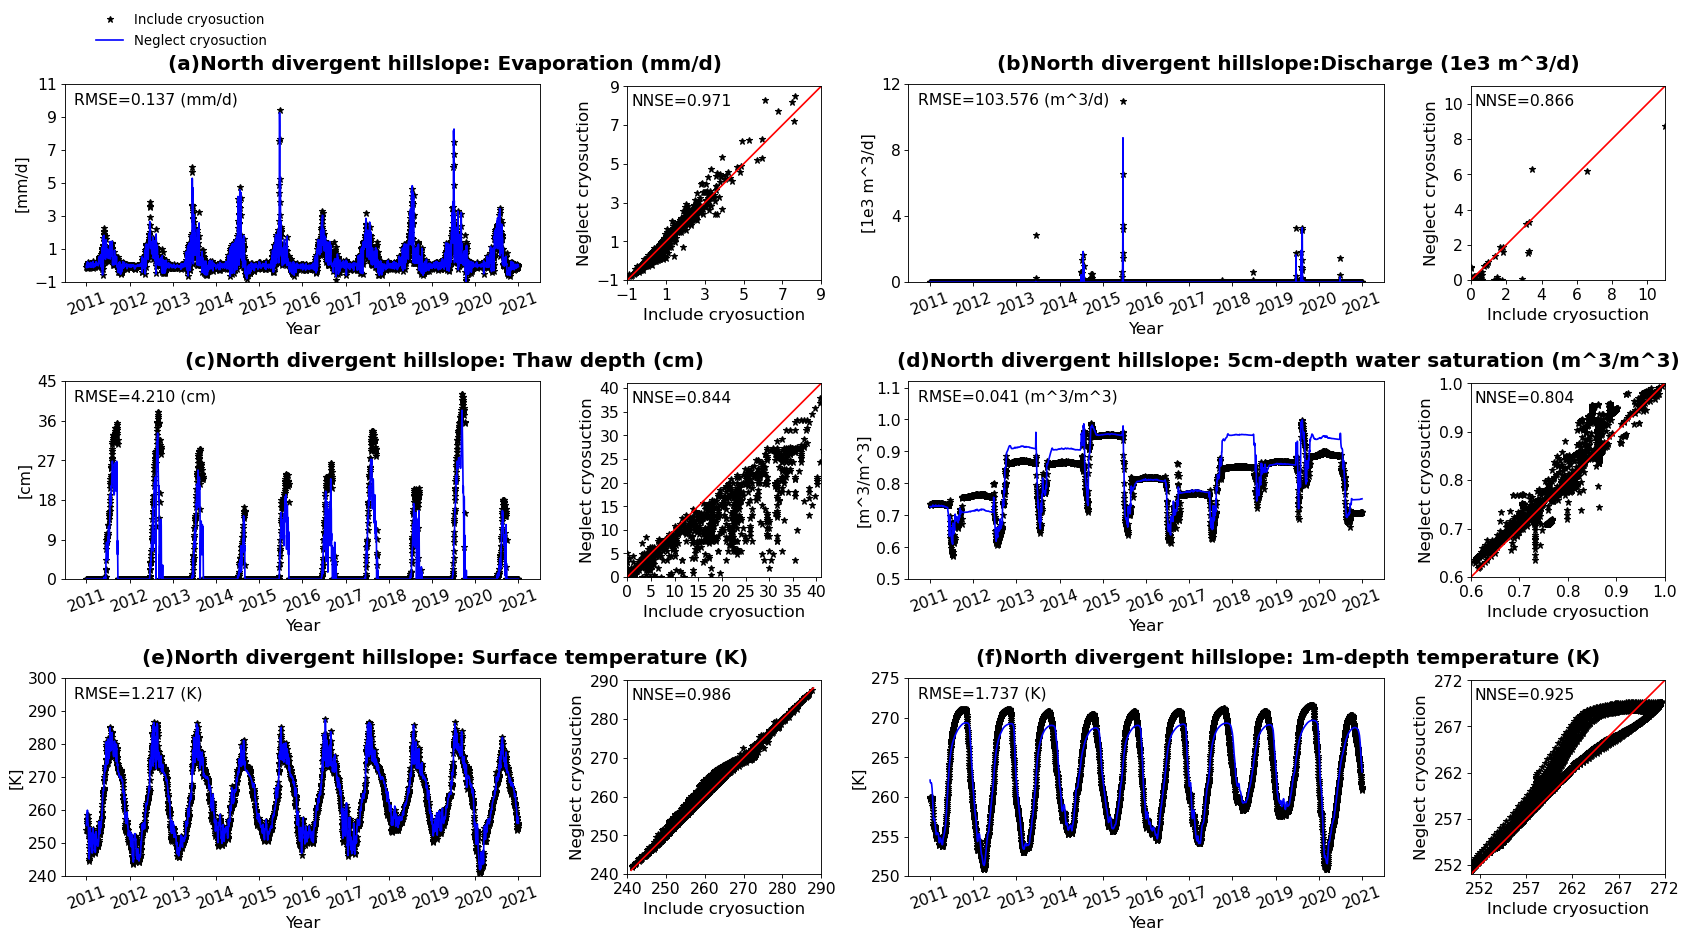

Supplement: Supplementary file 2 [file tc-2021-362-supplement.zip › Supplement/Barrow/cryosuction_north_divergent_barrow.png]

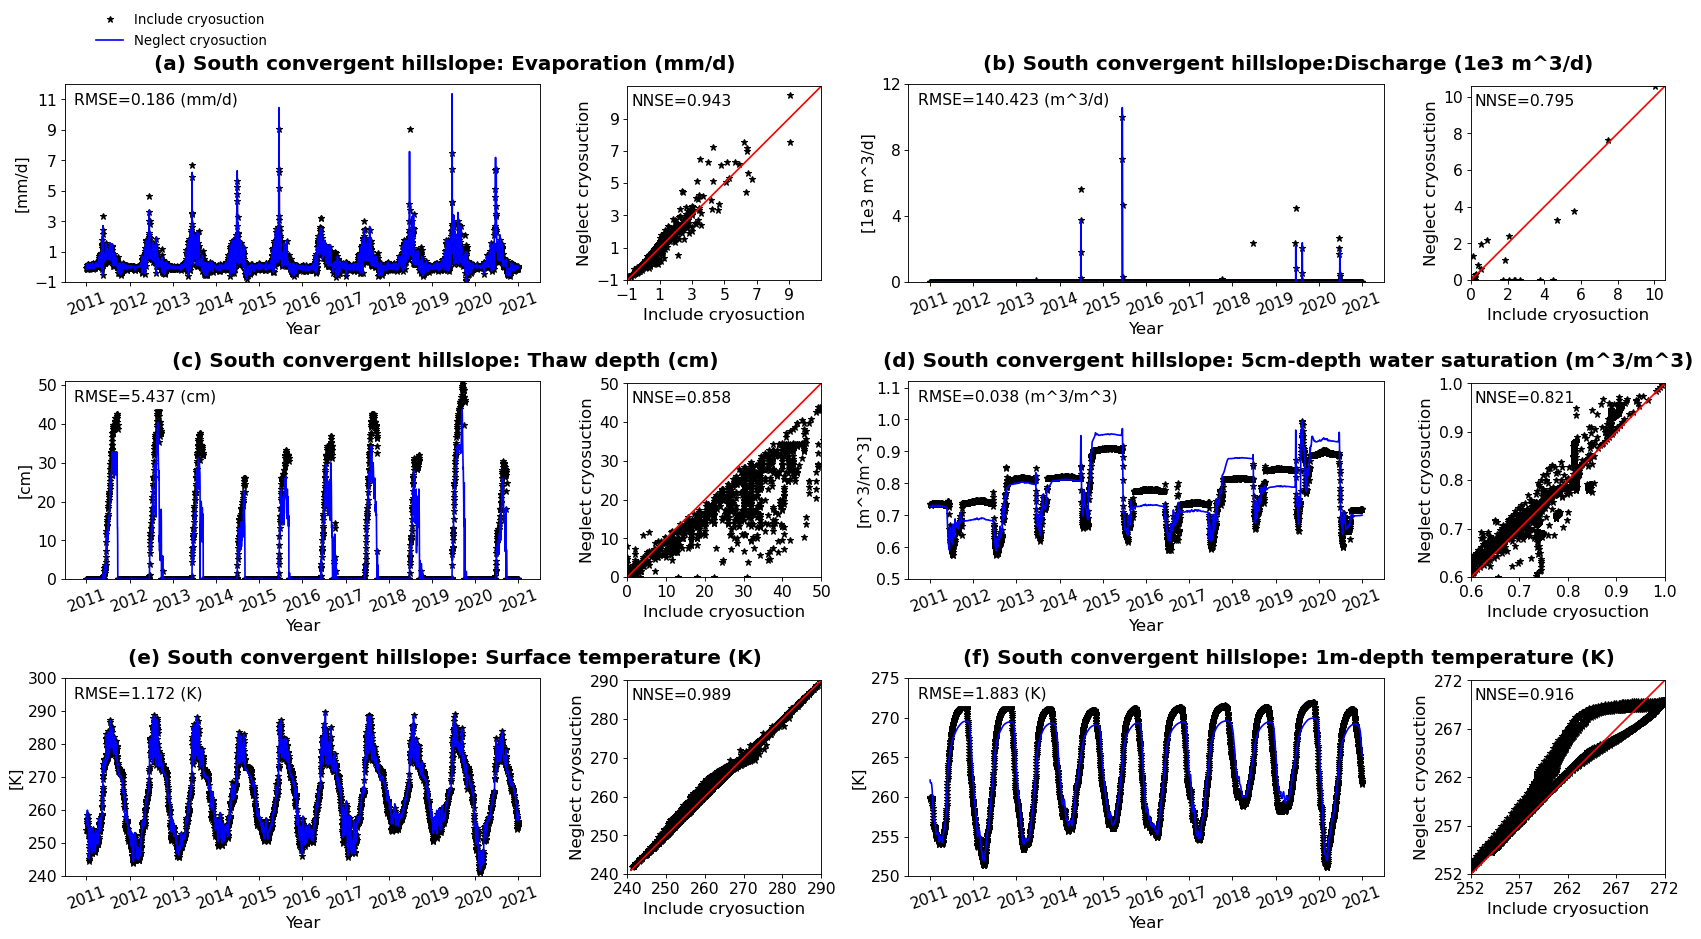

Supplement: Supplementary file 2 [file tc-2021-362-supplement.zip › Supplement/Barrow/cryosuction_south_convergent_barrow.png]

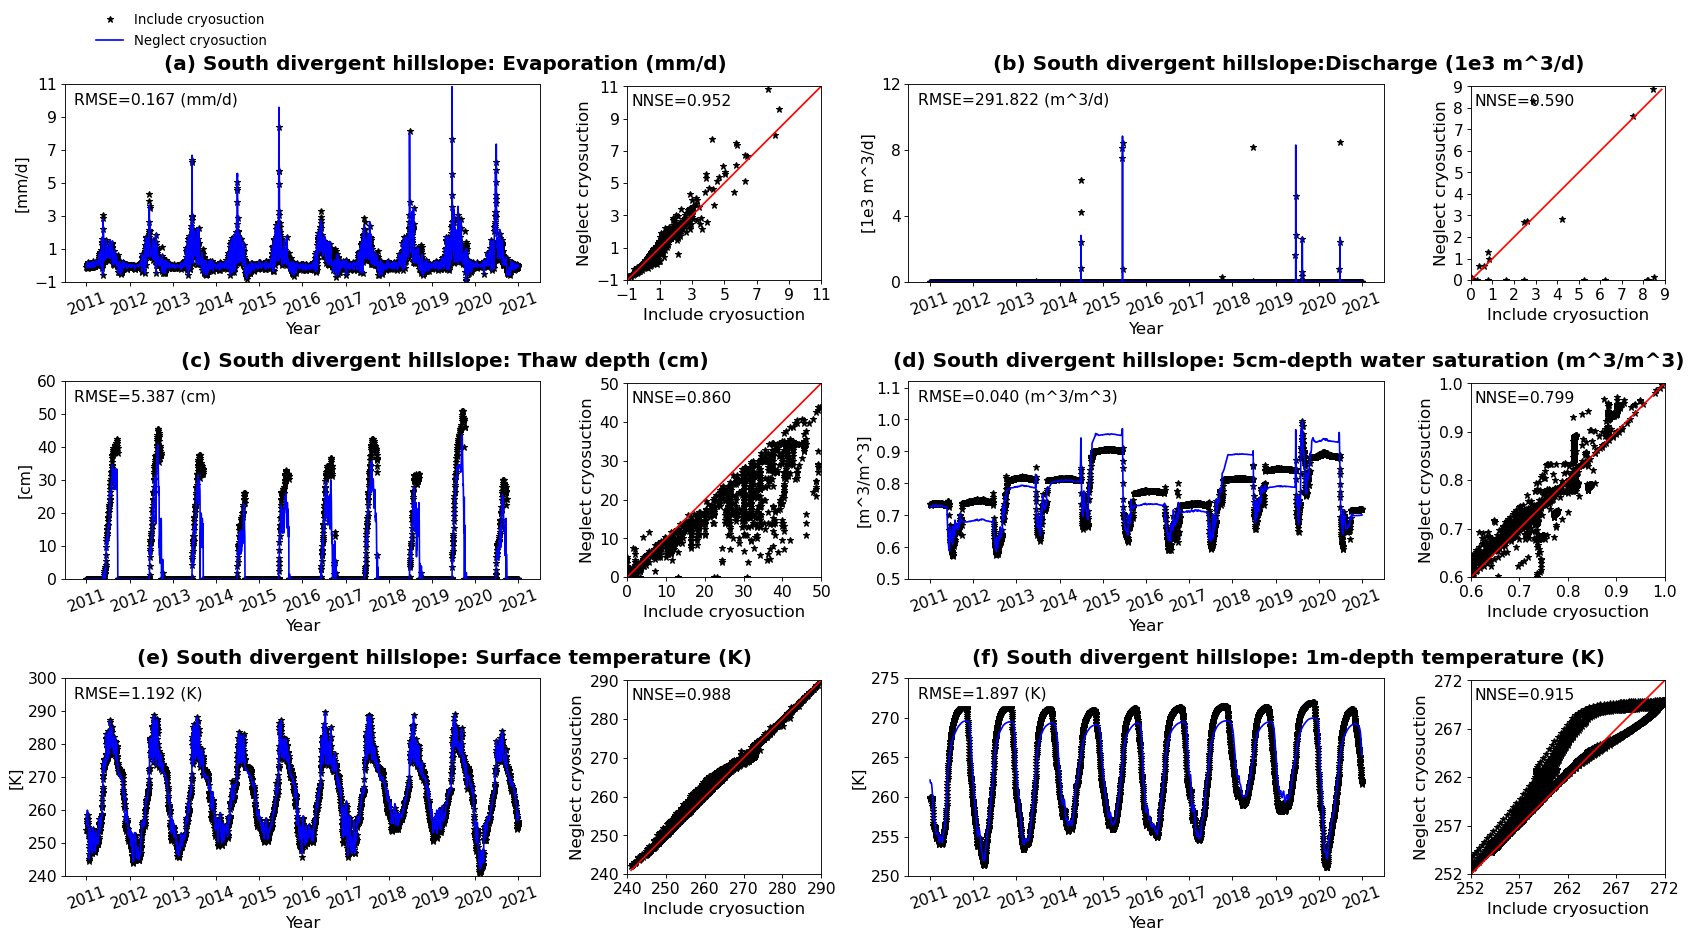

Supplement: Supplementary file 2 [file tc-2021-362-supplement.zip › Supplement/Barrow/cryosuction_south_divergent_barrow.png]

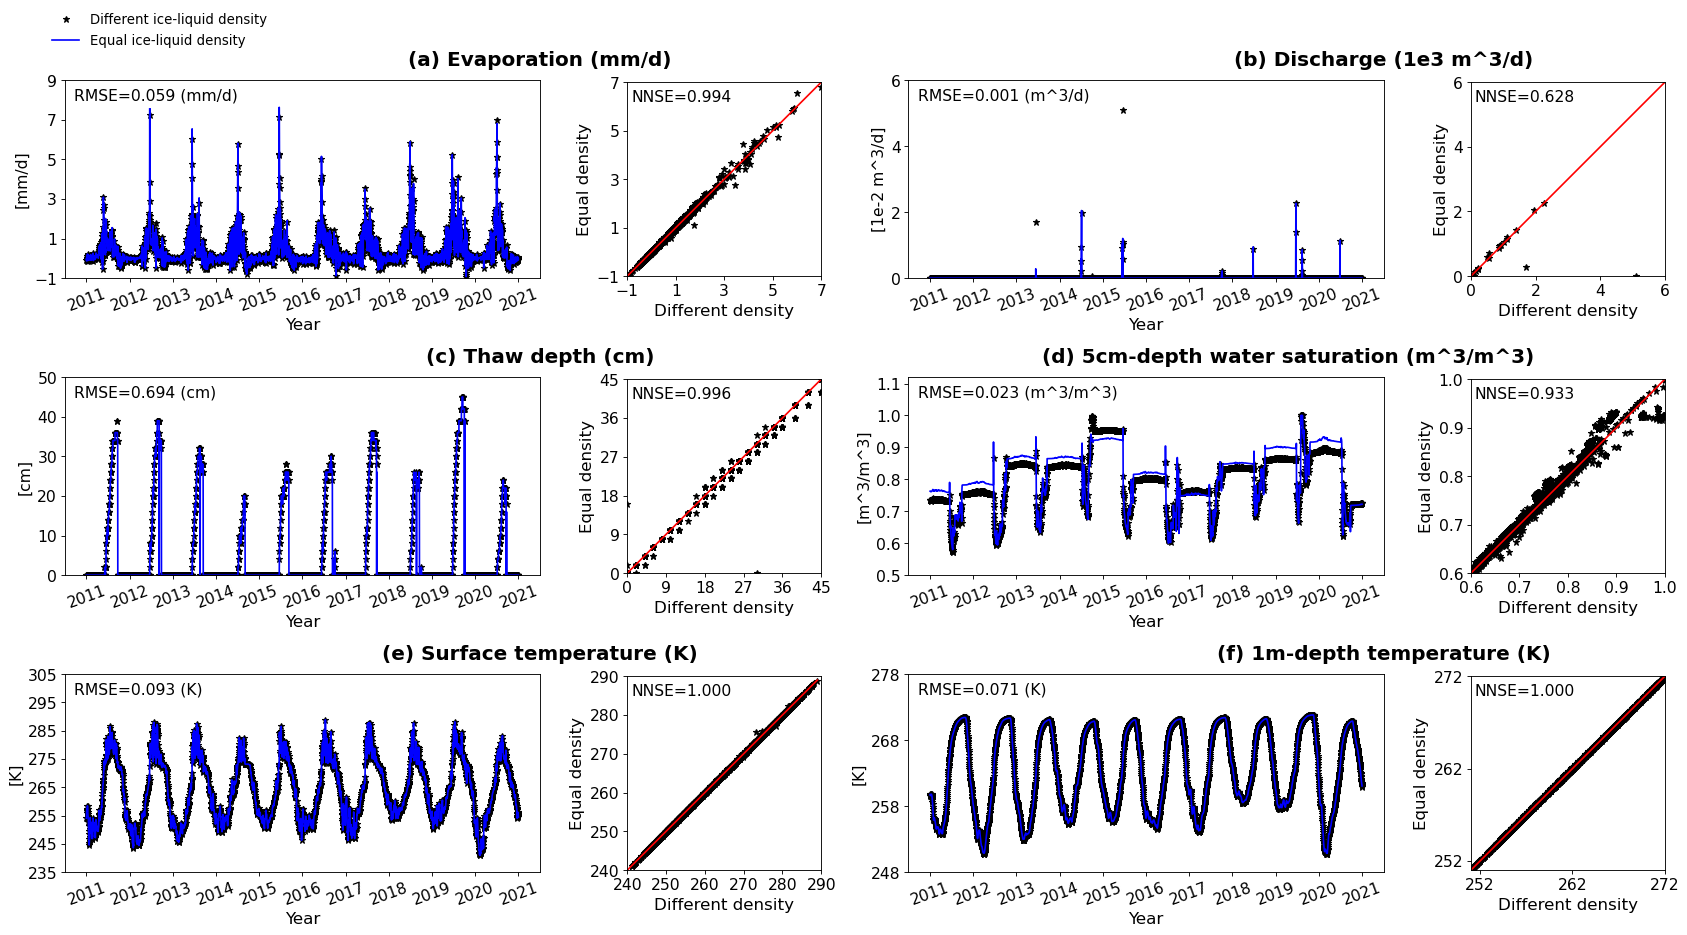

Supplement: Supplementary file 2 [file tc-2021-362-supplement.zip › Supplement/Barrow/density_column_barrow.png]

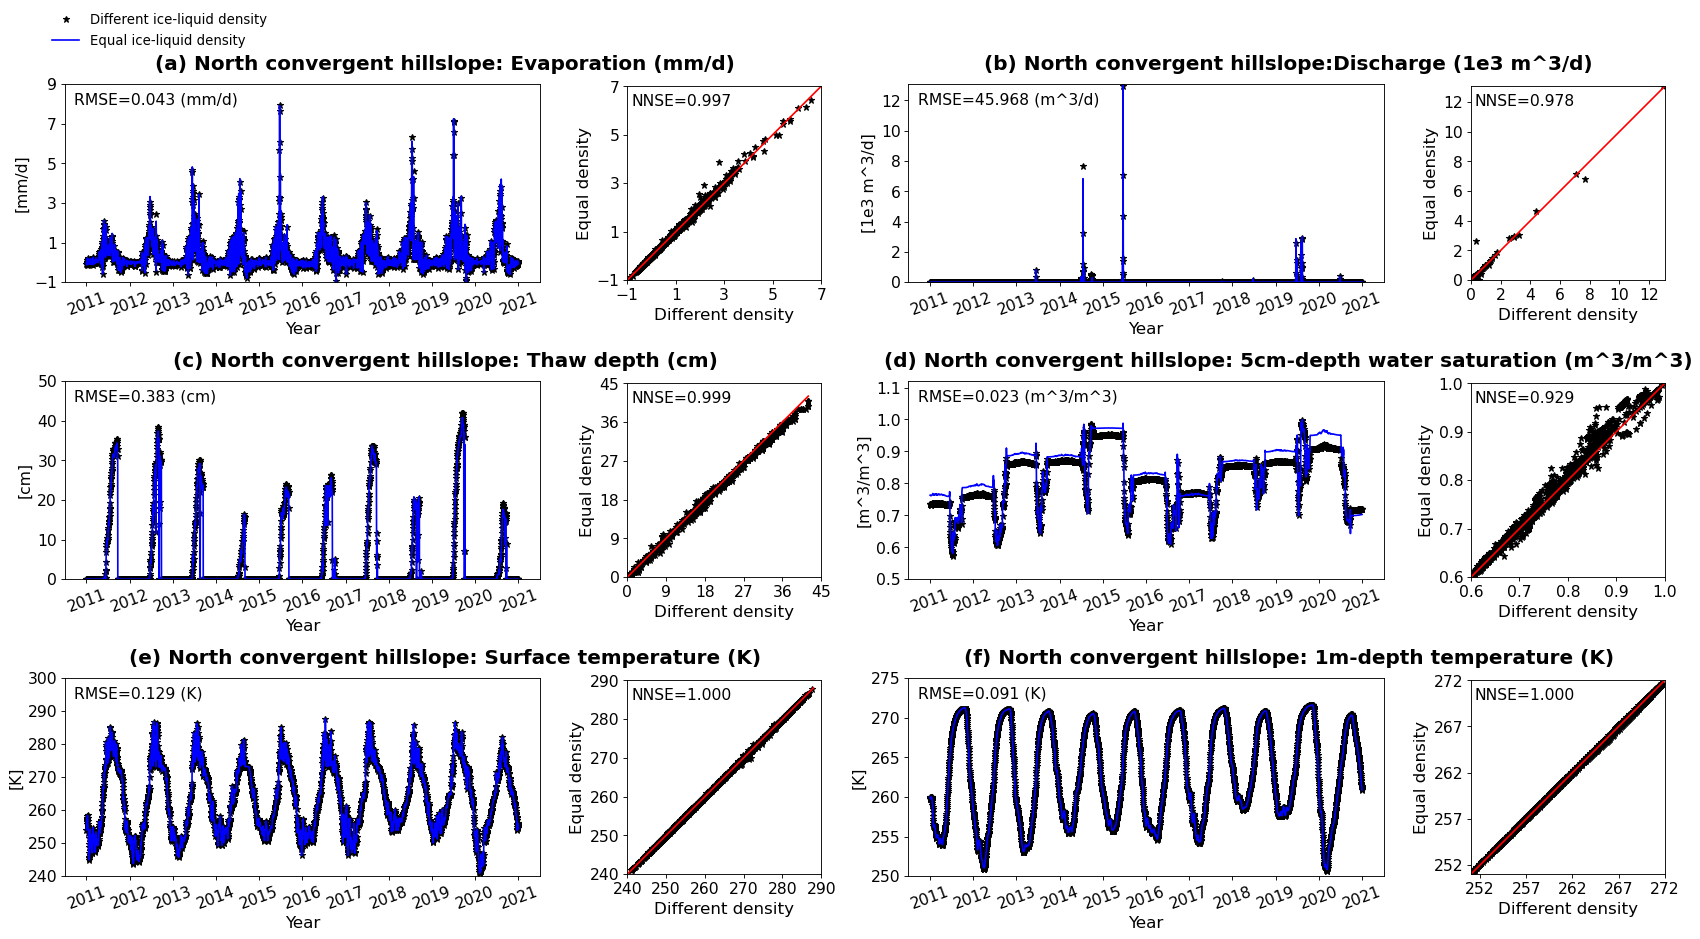

Supplement: Supplementary file 2 [file tc-2021-362-supplement.zip › Supplement/Barrow/density_north_convergent_barrow.png]

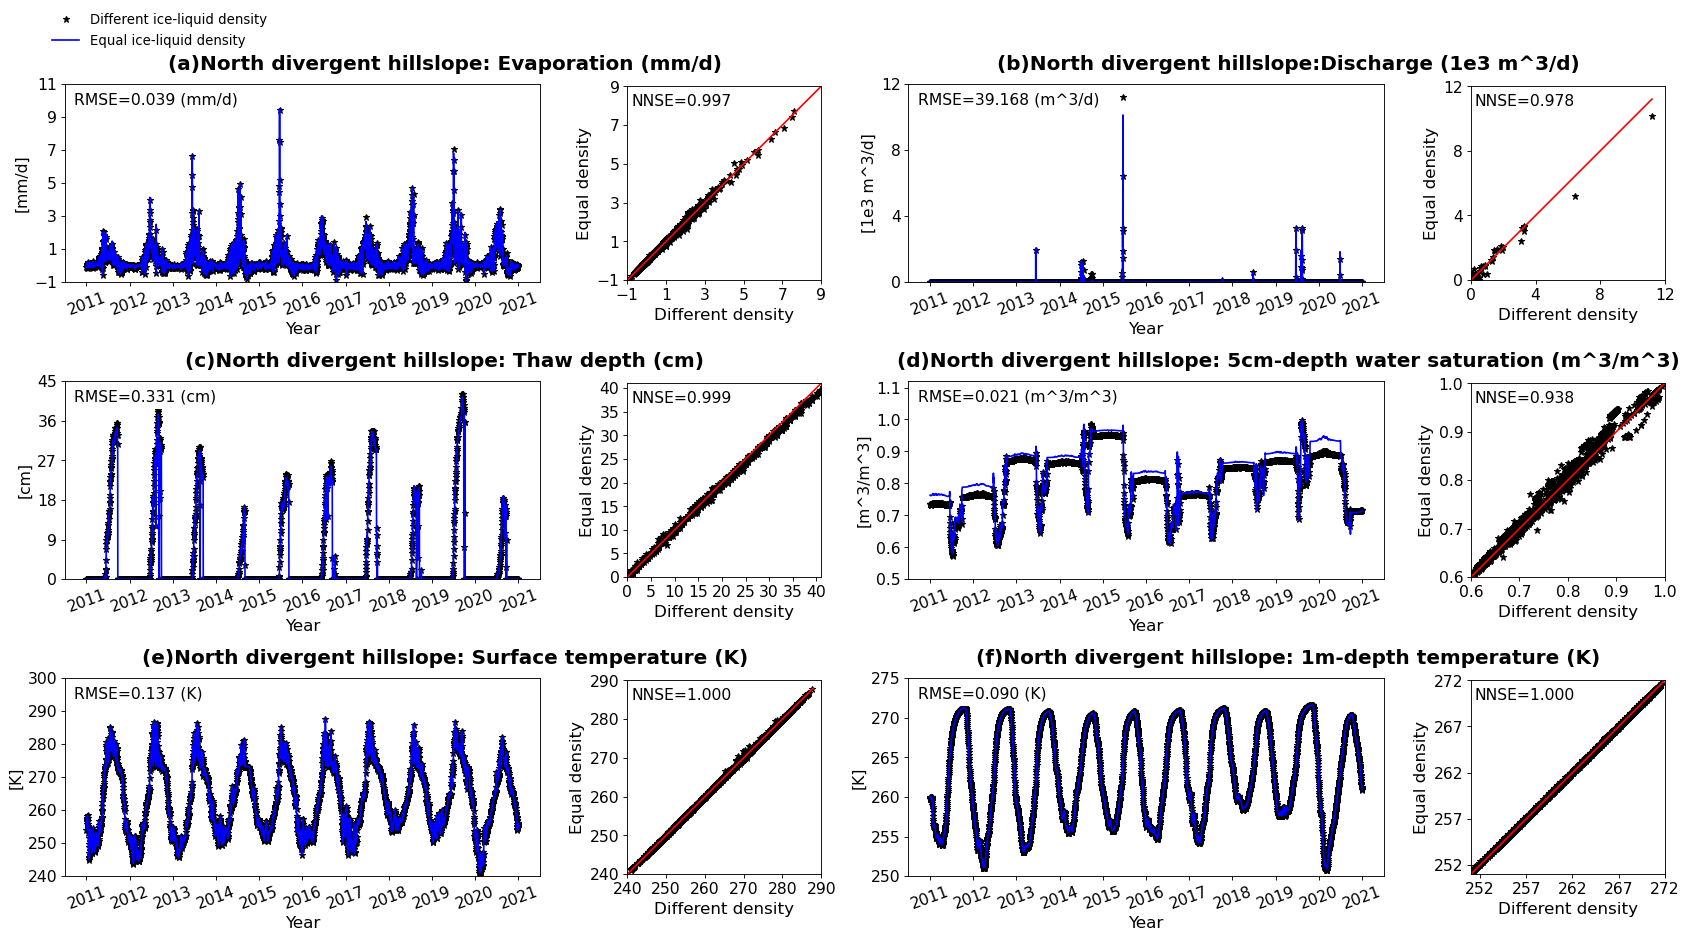

Supplement: Supplementary file 2 [file tc-2021-362-supplement.zip › Supplement/Barrow/density_north_divergent_barrow.png]

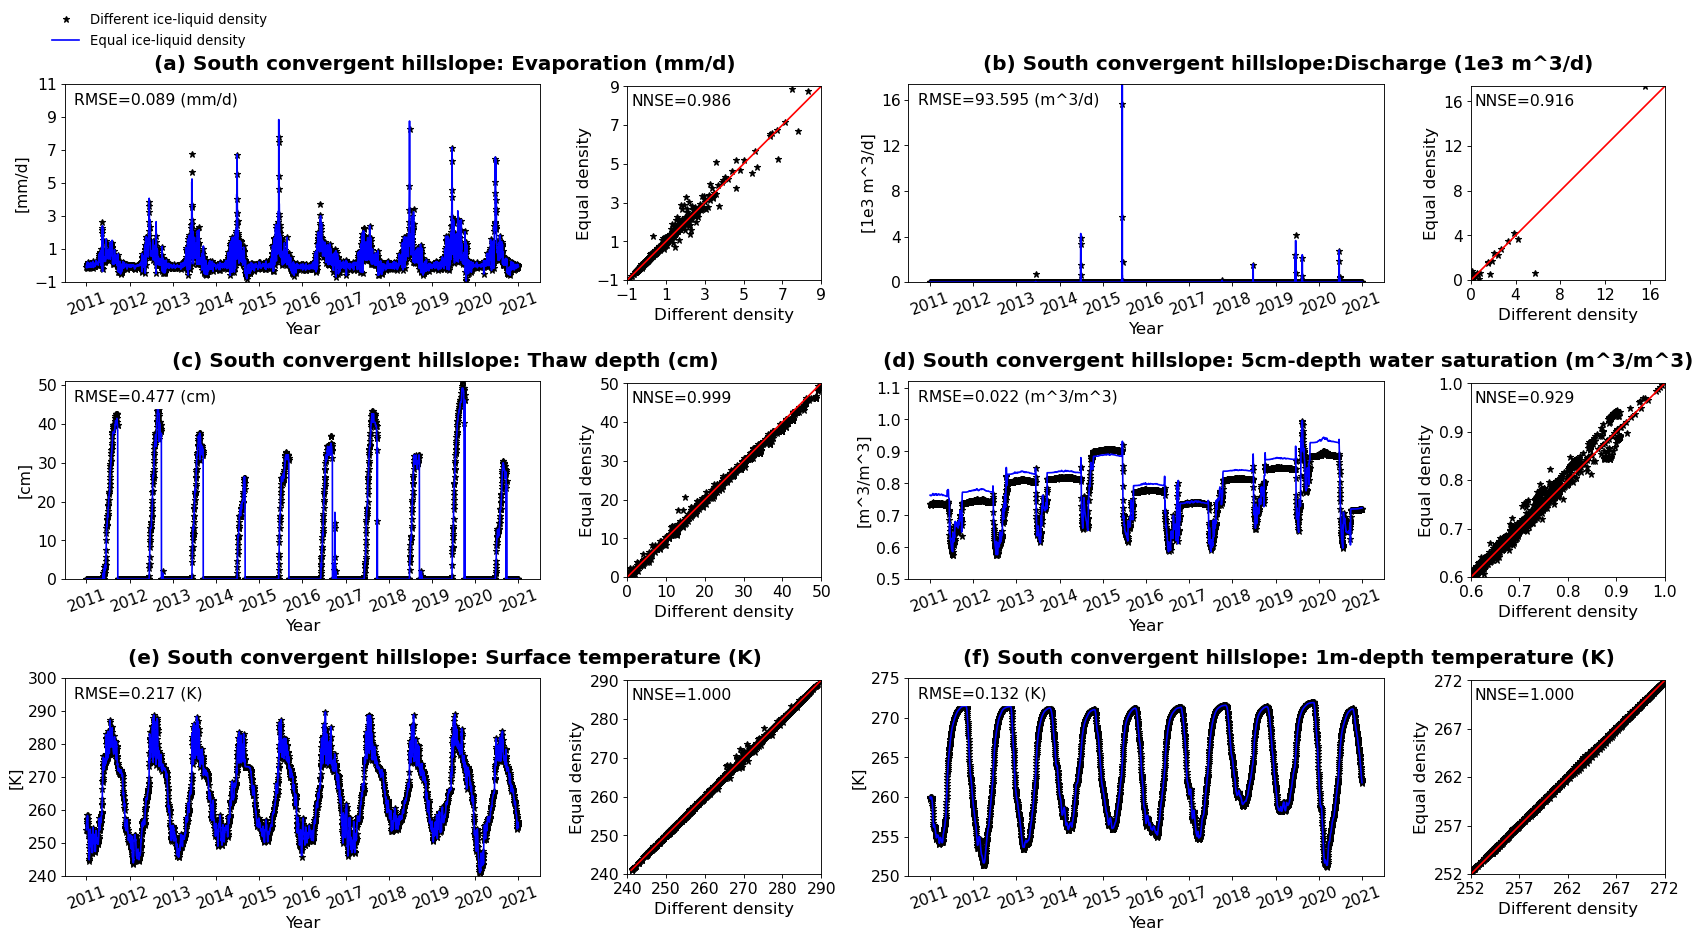

Supplement: Supplementary file 2 [file tc-2021-362-supplement.zip › Supplement/Barrow/density_south_convergent_barrow.png]

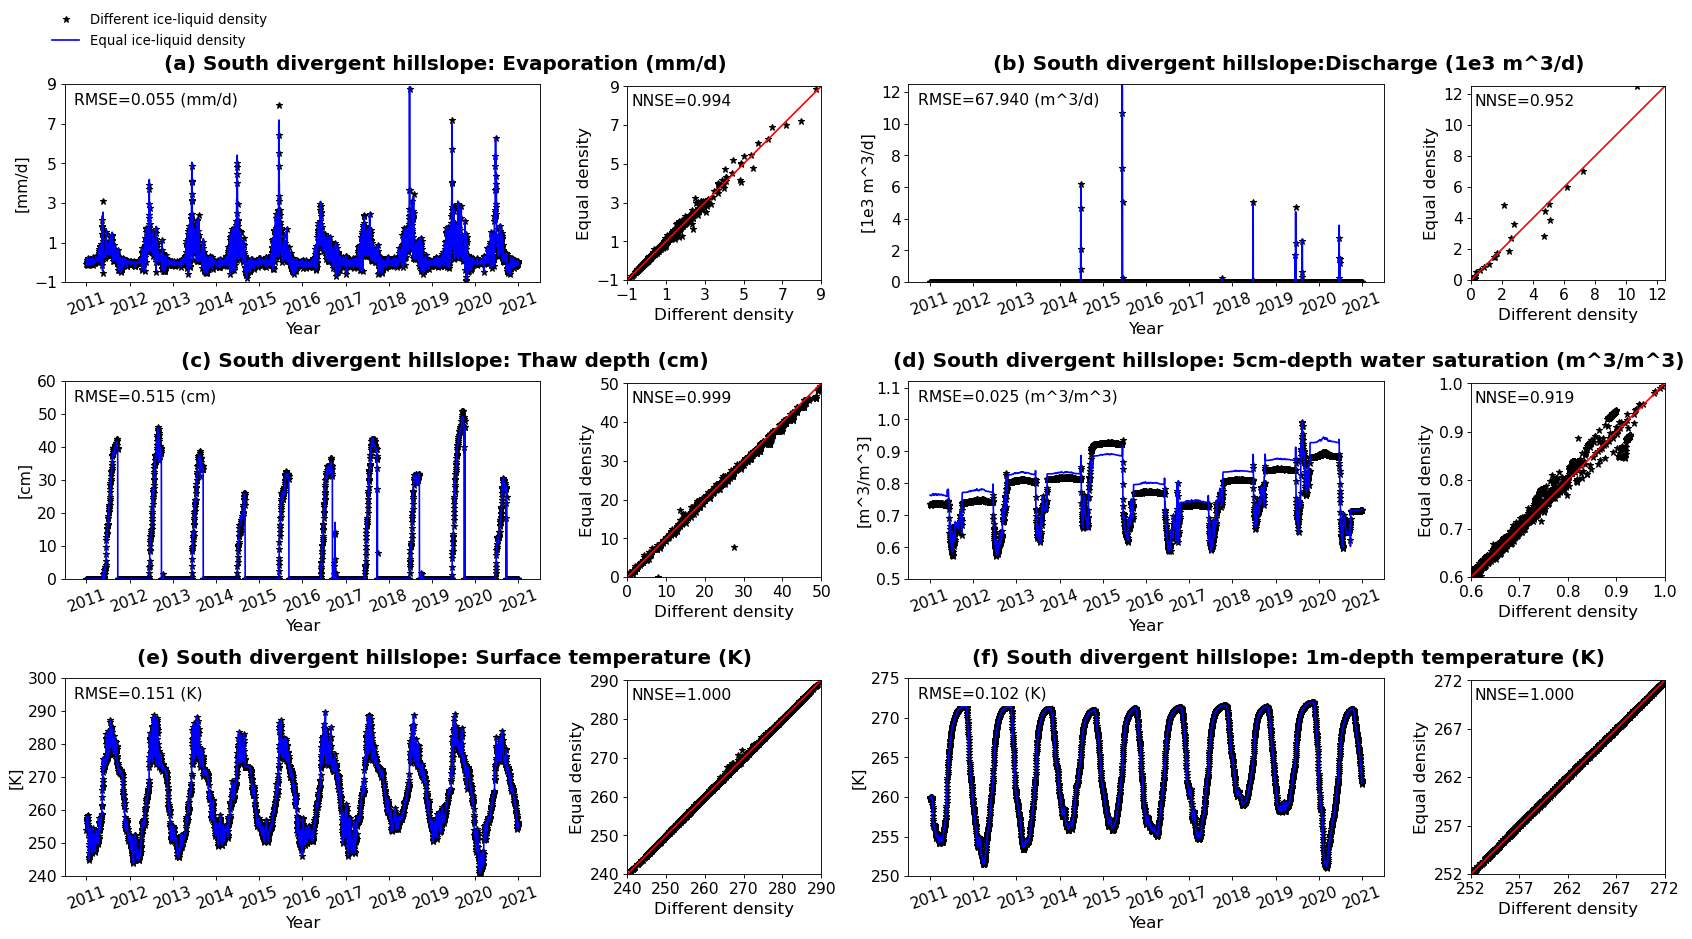

Supplement: Supplementary file 2 [file tc-2021-362-supplement.zip › Supplement/Barrow/density_south_divergent_barrow.png]

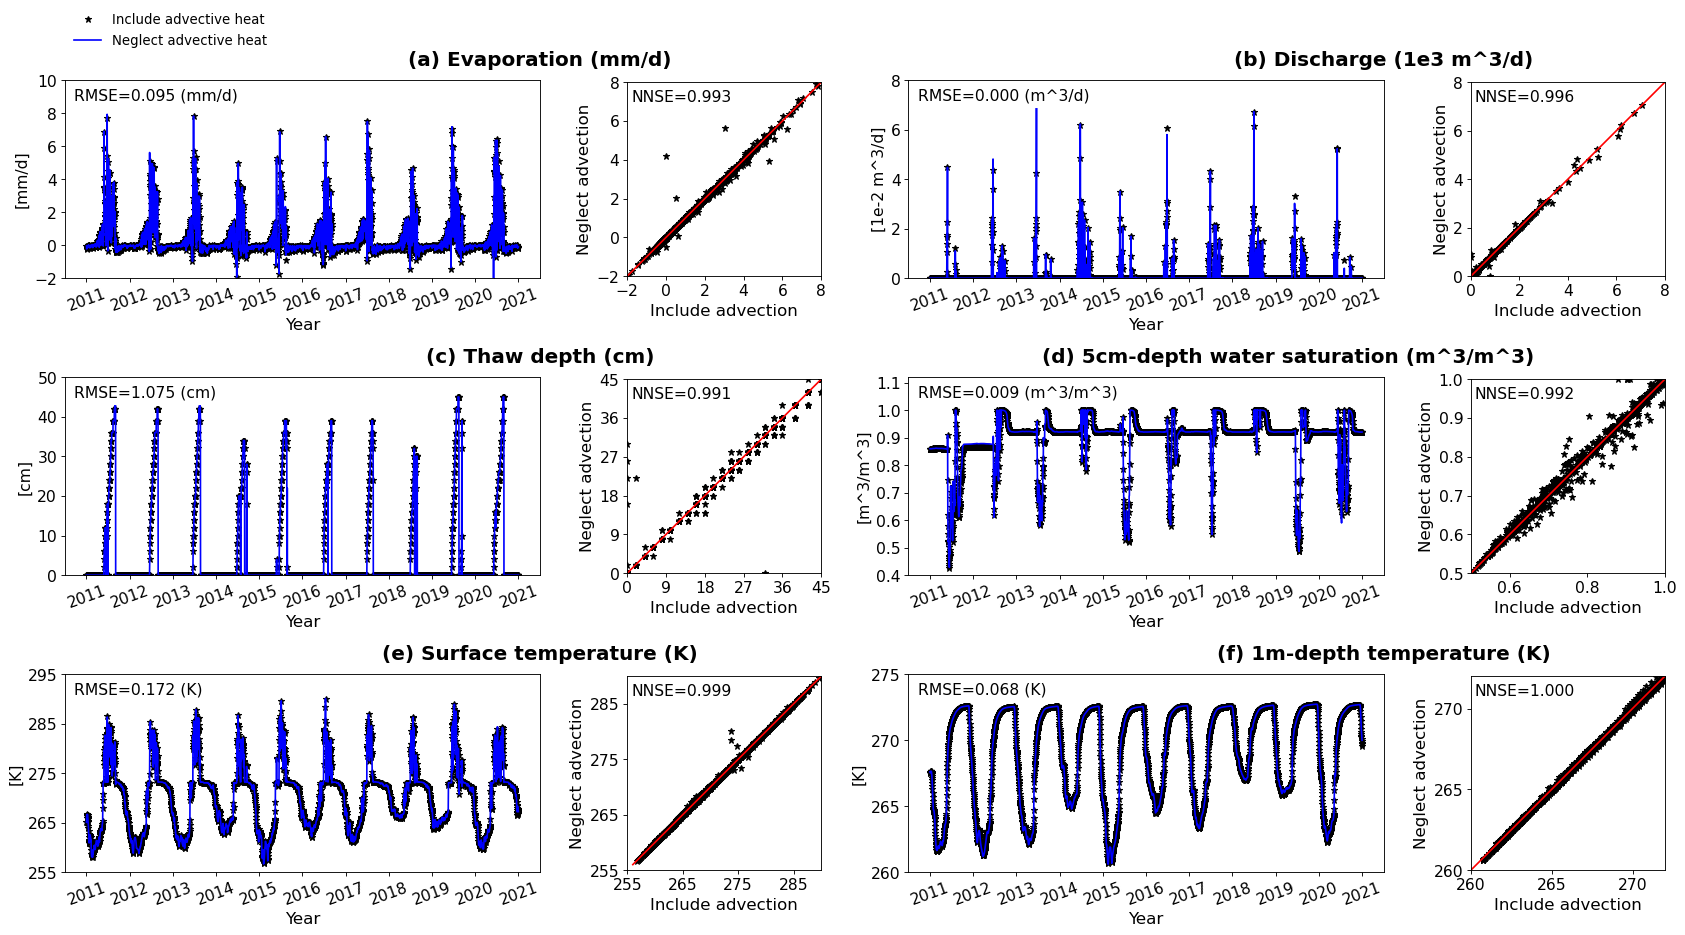

Supplement: Supplementary file 2 [file tc-2021-362-supplement.zip › Supplement/Sag/advection_column_sag.png]

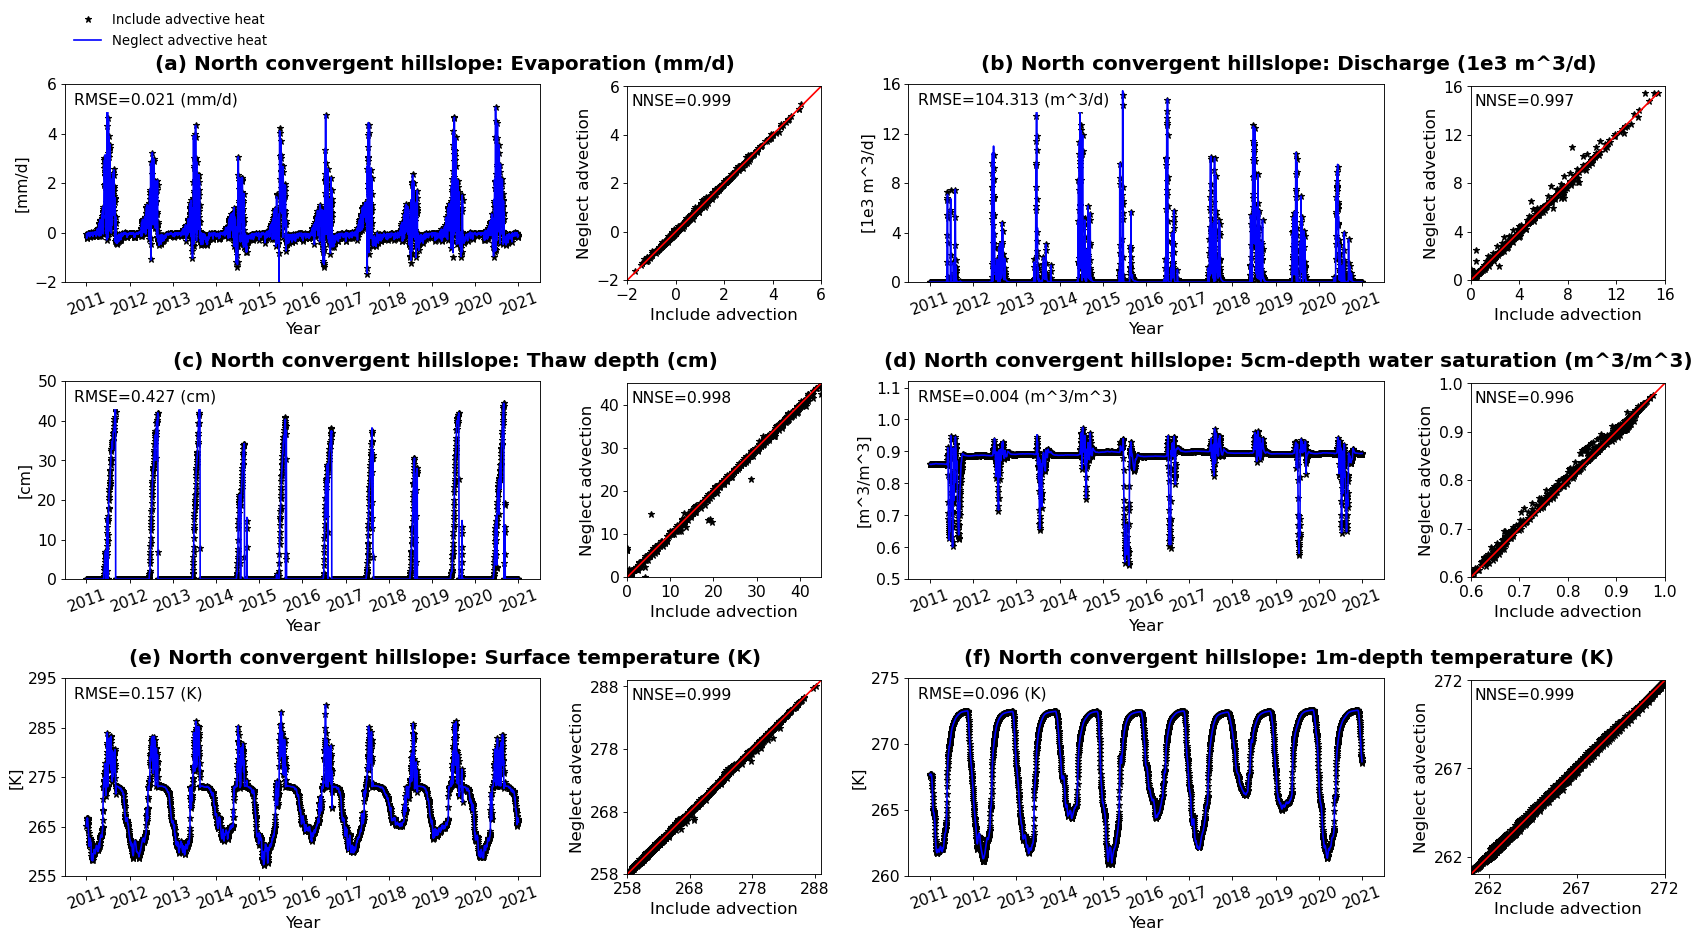

Supplement: Supplementary file 2 [file tc-2021-362-supplement.zip › Supplement/Sag/advection_north_convergent_sag.png]

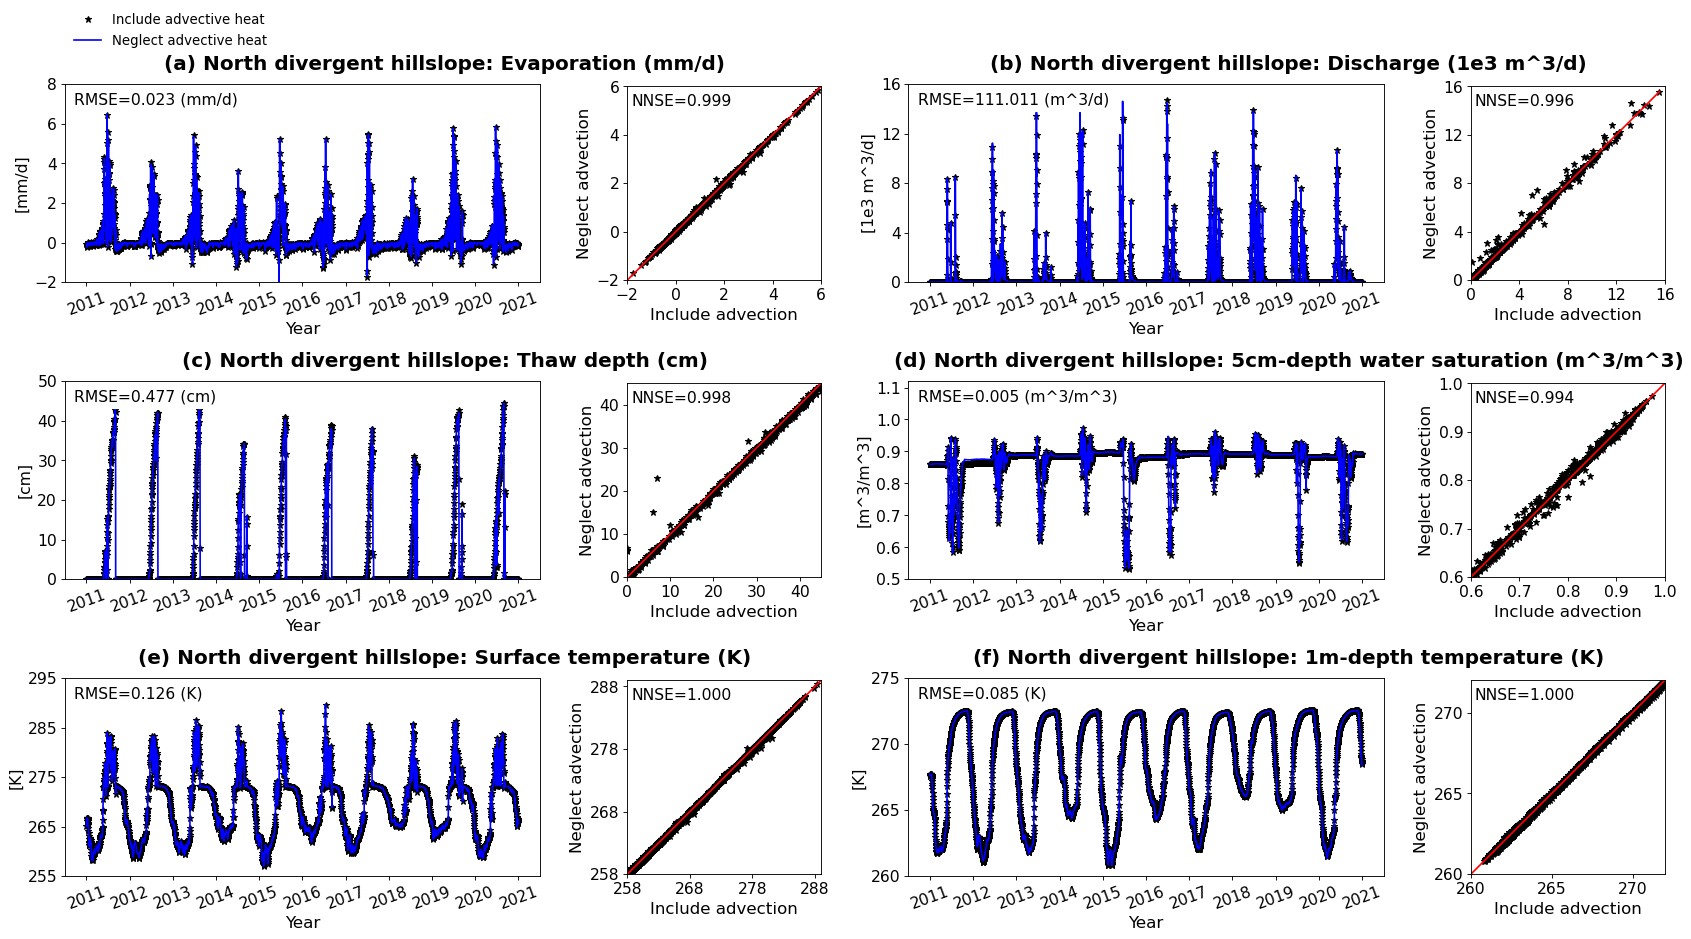

Supplement: Supplementary file 2 [file tc-2021-362-supplement.zip › Supplement/Sag/advection_north_divergent_sag.png]

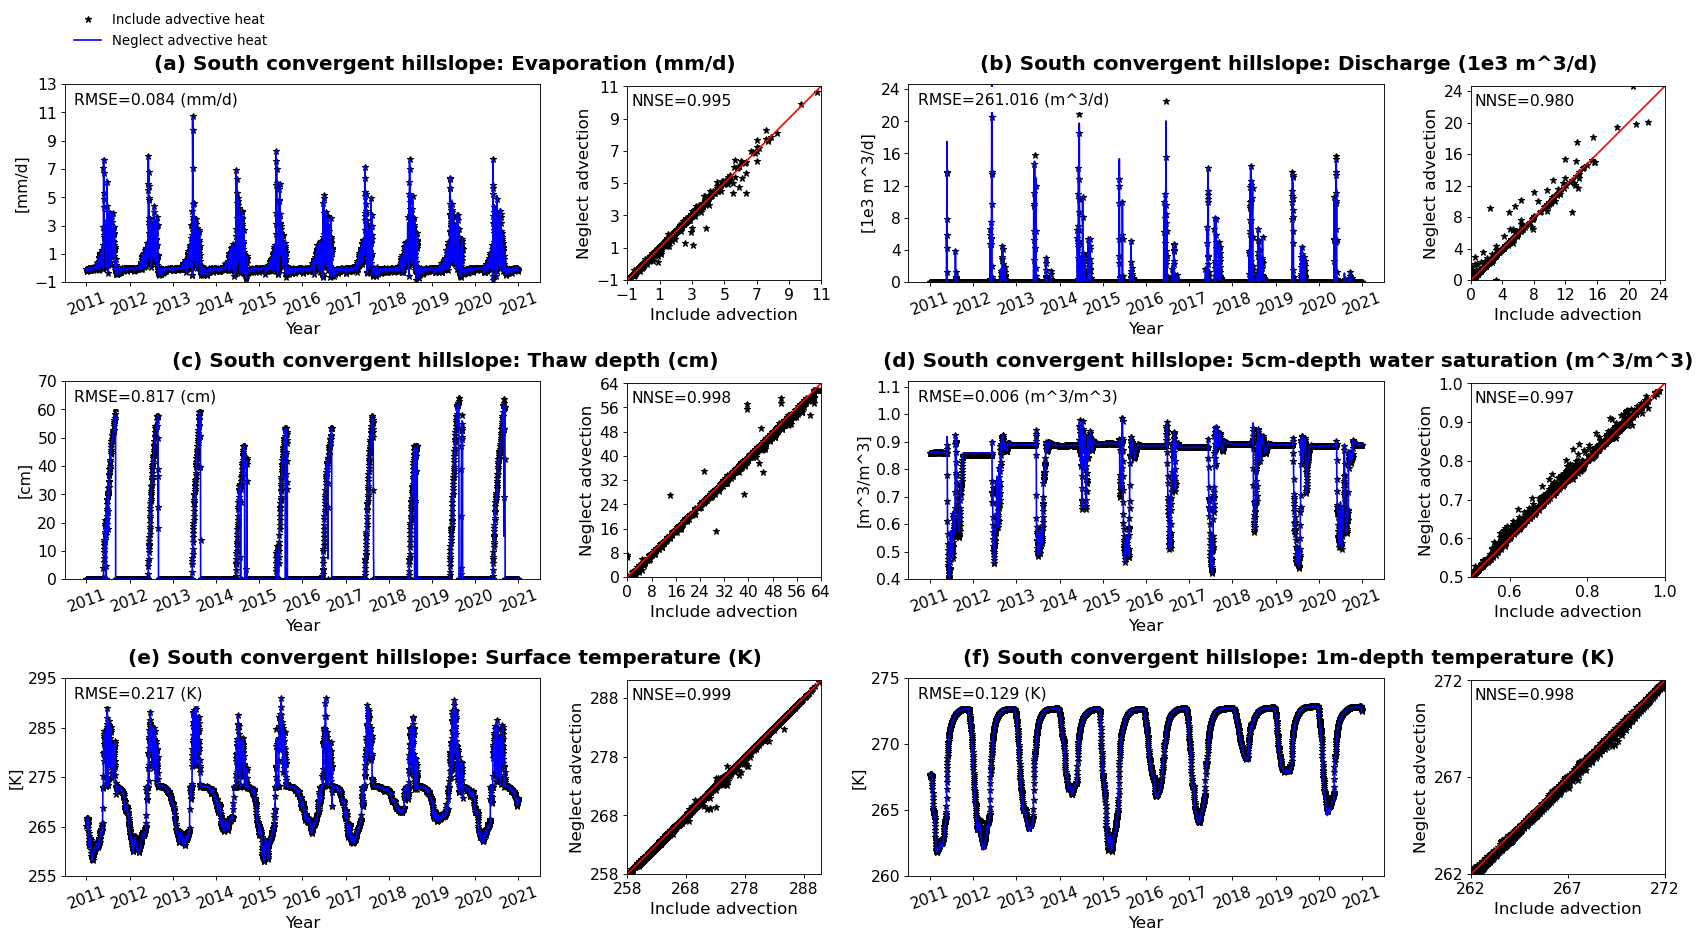

Supplement: Supplementary file 2 [file tc-2021-362-supplement.zip › Supplement/Sag/advection_south_convergent_sag.png]

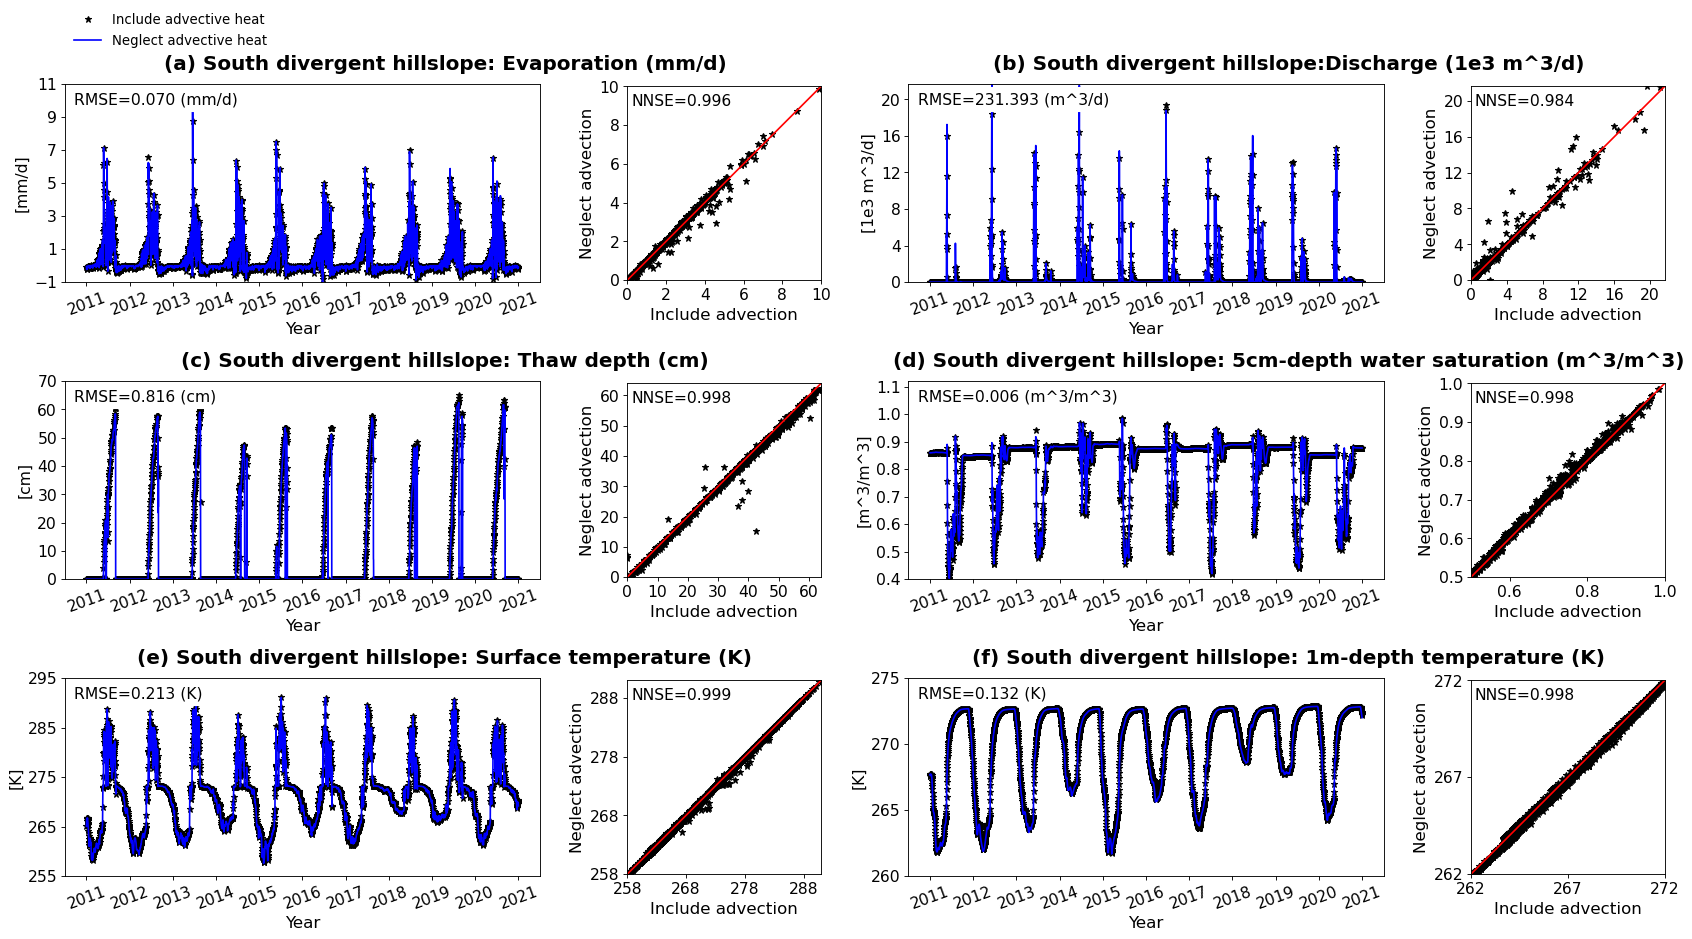

Supplement: Supplementary file 2 [file tc-2021-362-supplement.zip › Supplement/Sag/advection_south_divergent_sag.png]

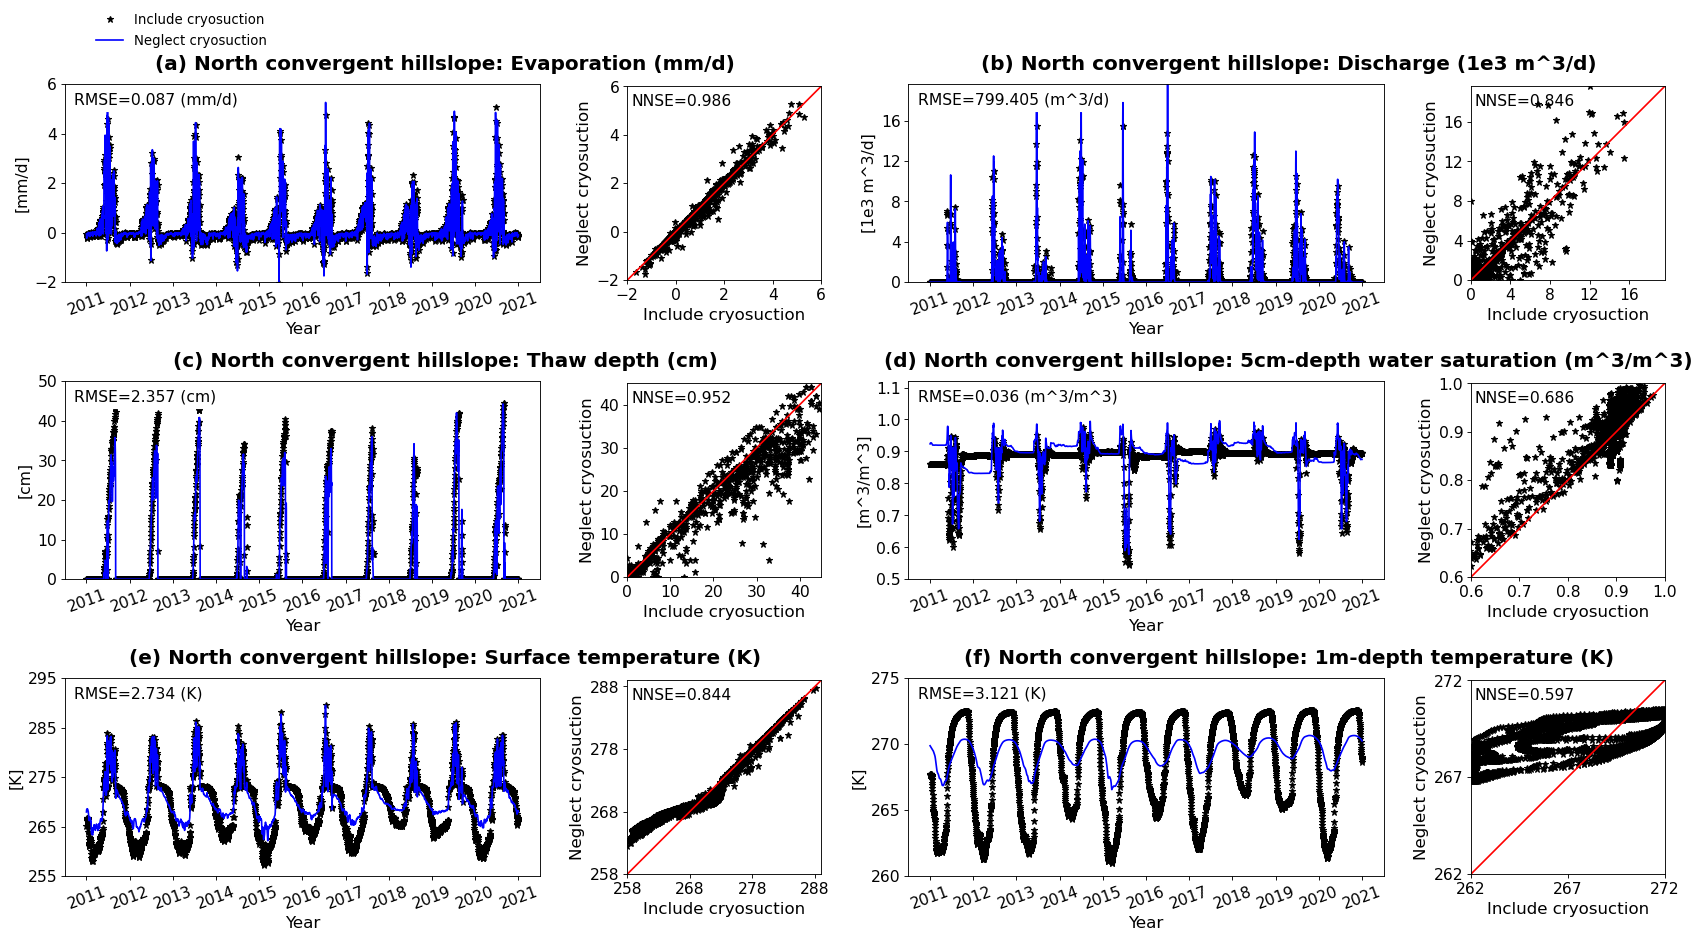

Supplement: Supplementary file 2 [file tc-2021-362-supplement.zip › Supplement/Sag/cryosuction_north_convergent_sag.png]

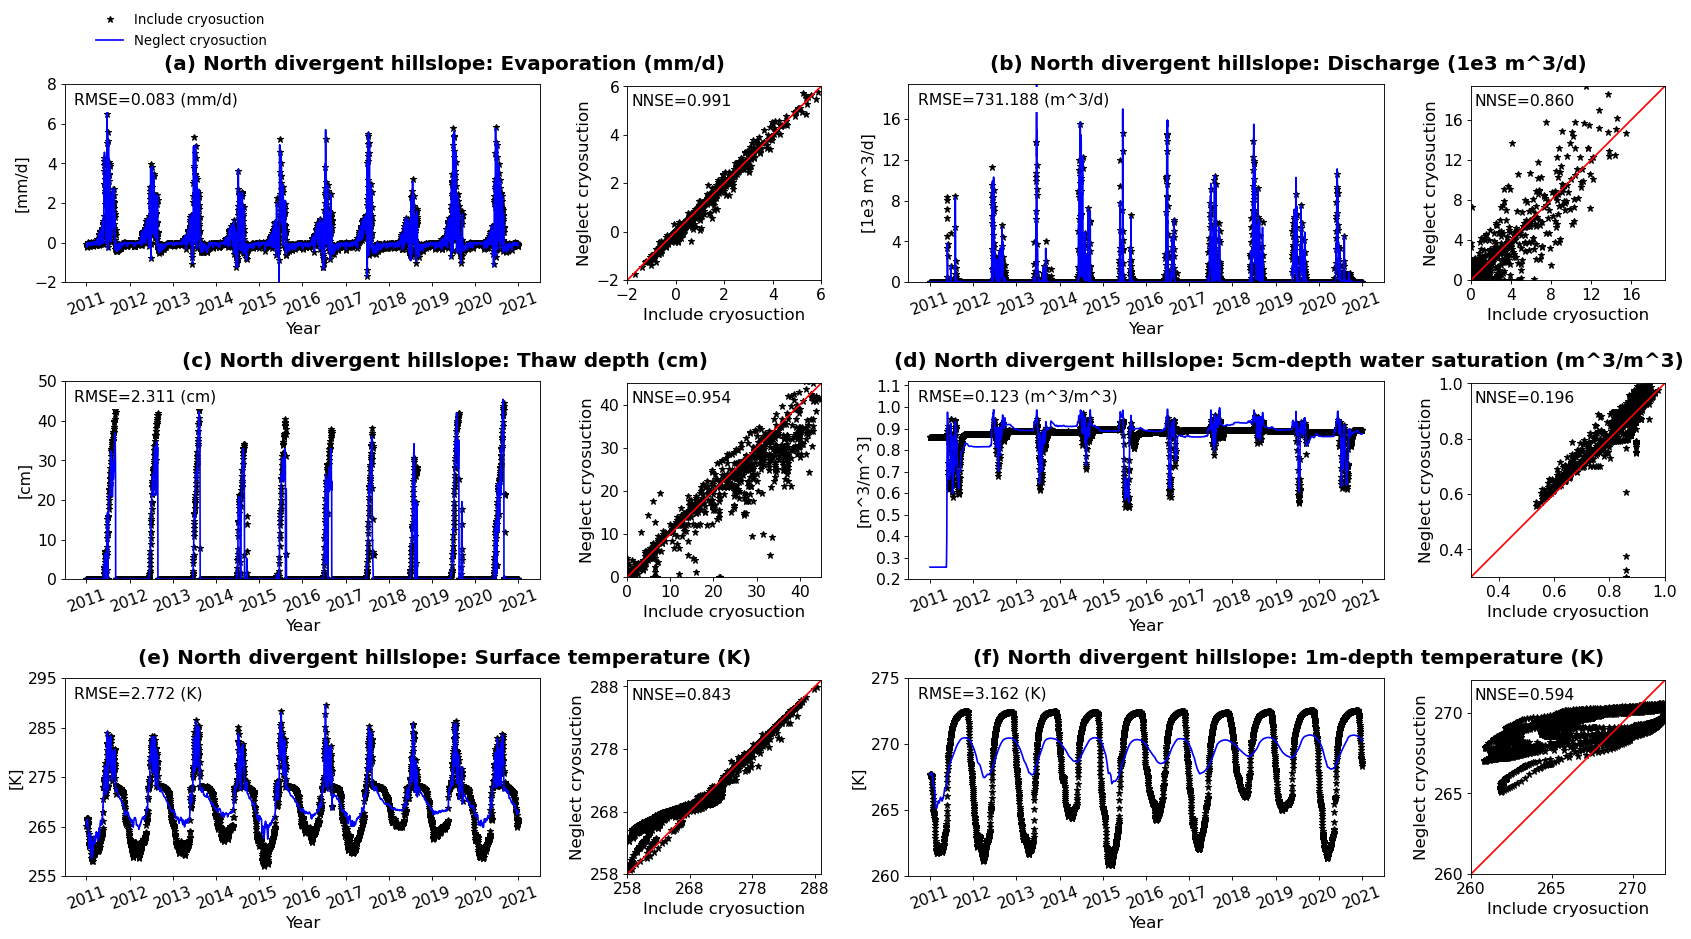

Supplement: Supplementary file 2 [file tc-2021-362-supplement.zip › Supplement/Sag/cryosuction_north_divergent_sag.png]

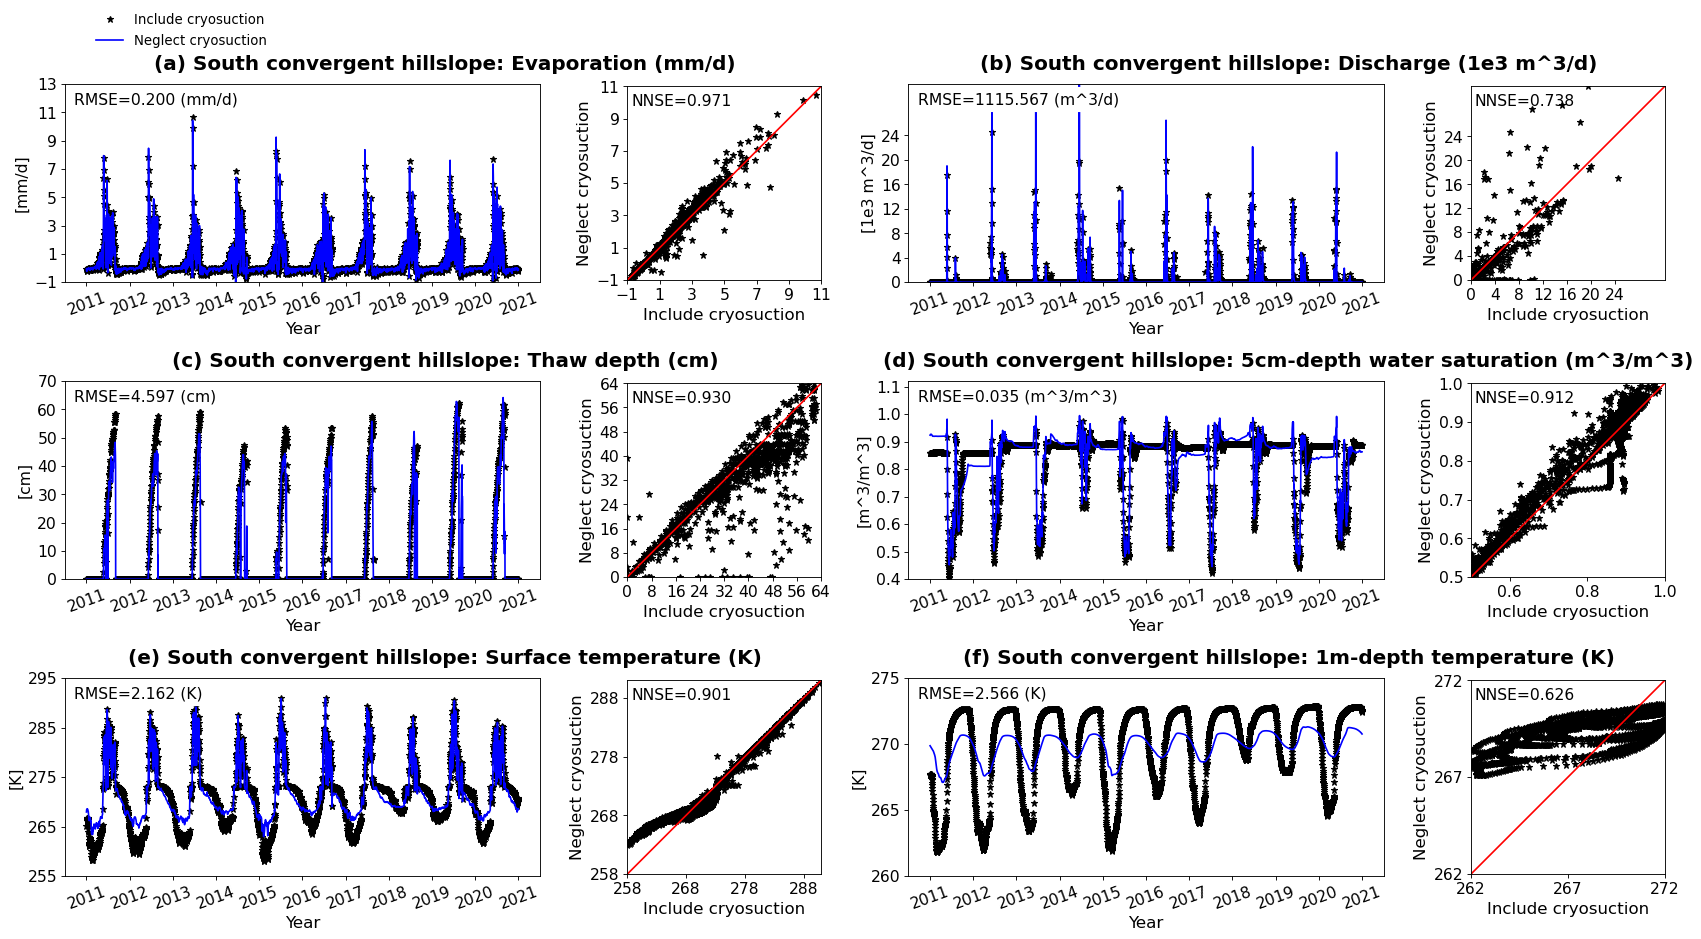

Supplement: Supplementary file 2 [file tc-2021-362-supplement.zip › Supplement/Sag/cryosuction_south_convergent_sag.png]

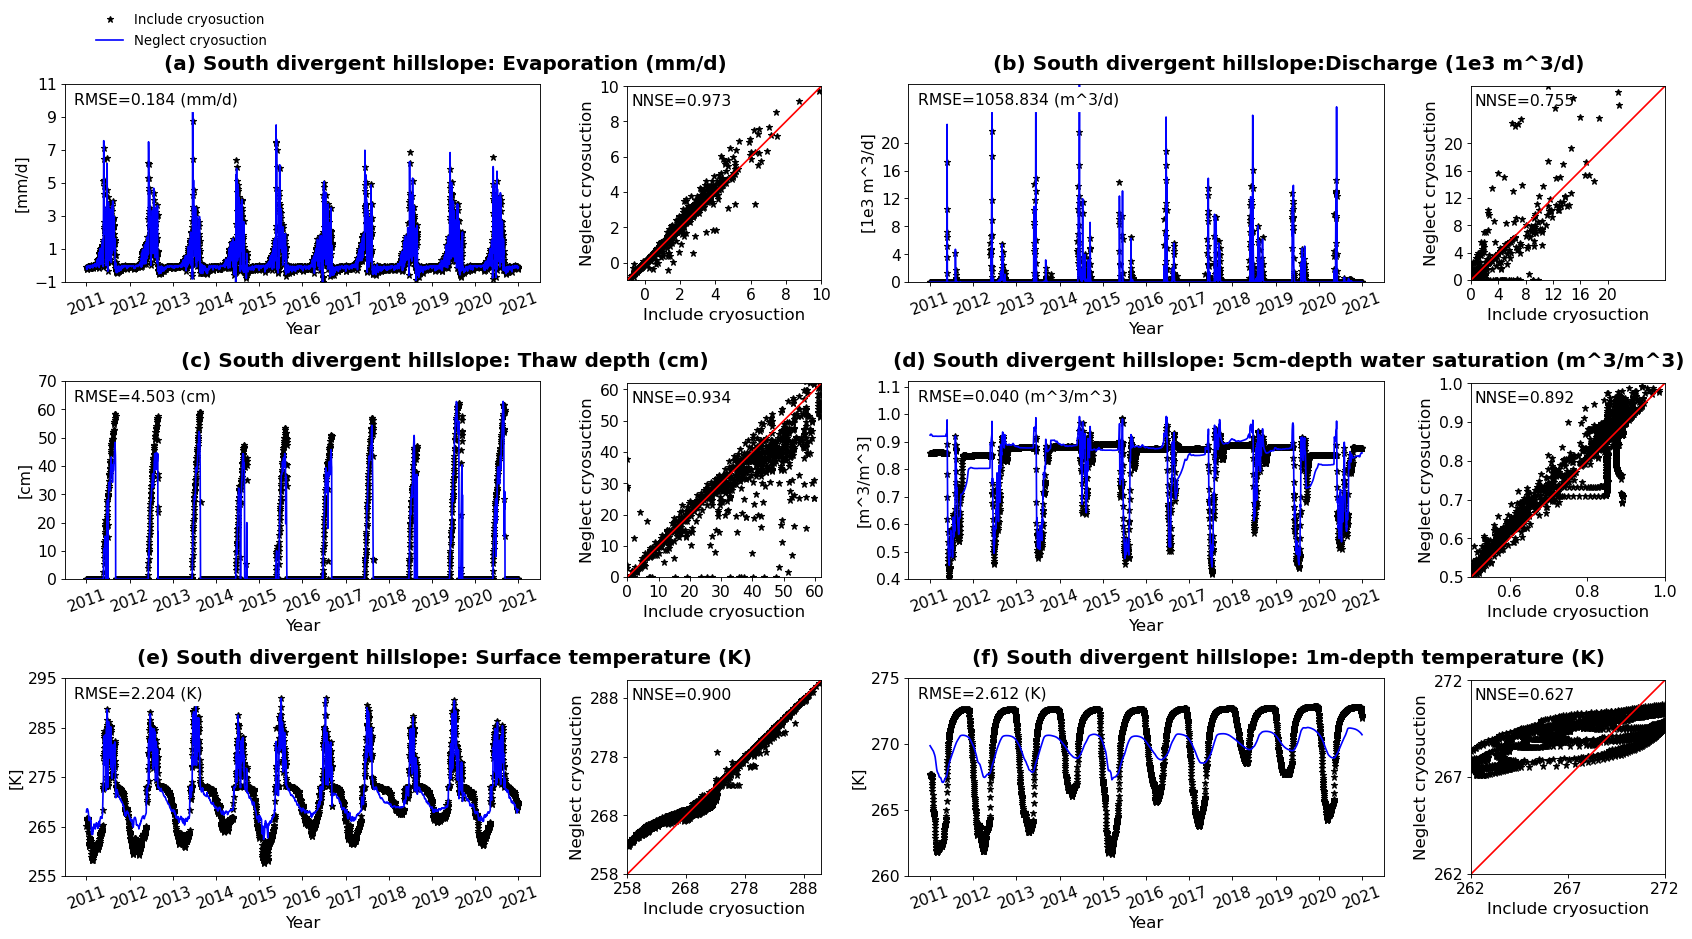

Supplement: Supplementary file 2 [file tc-2021-362-supplement.zip › Supplement/Sag/cryosuction_south_divergent_sag.png]

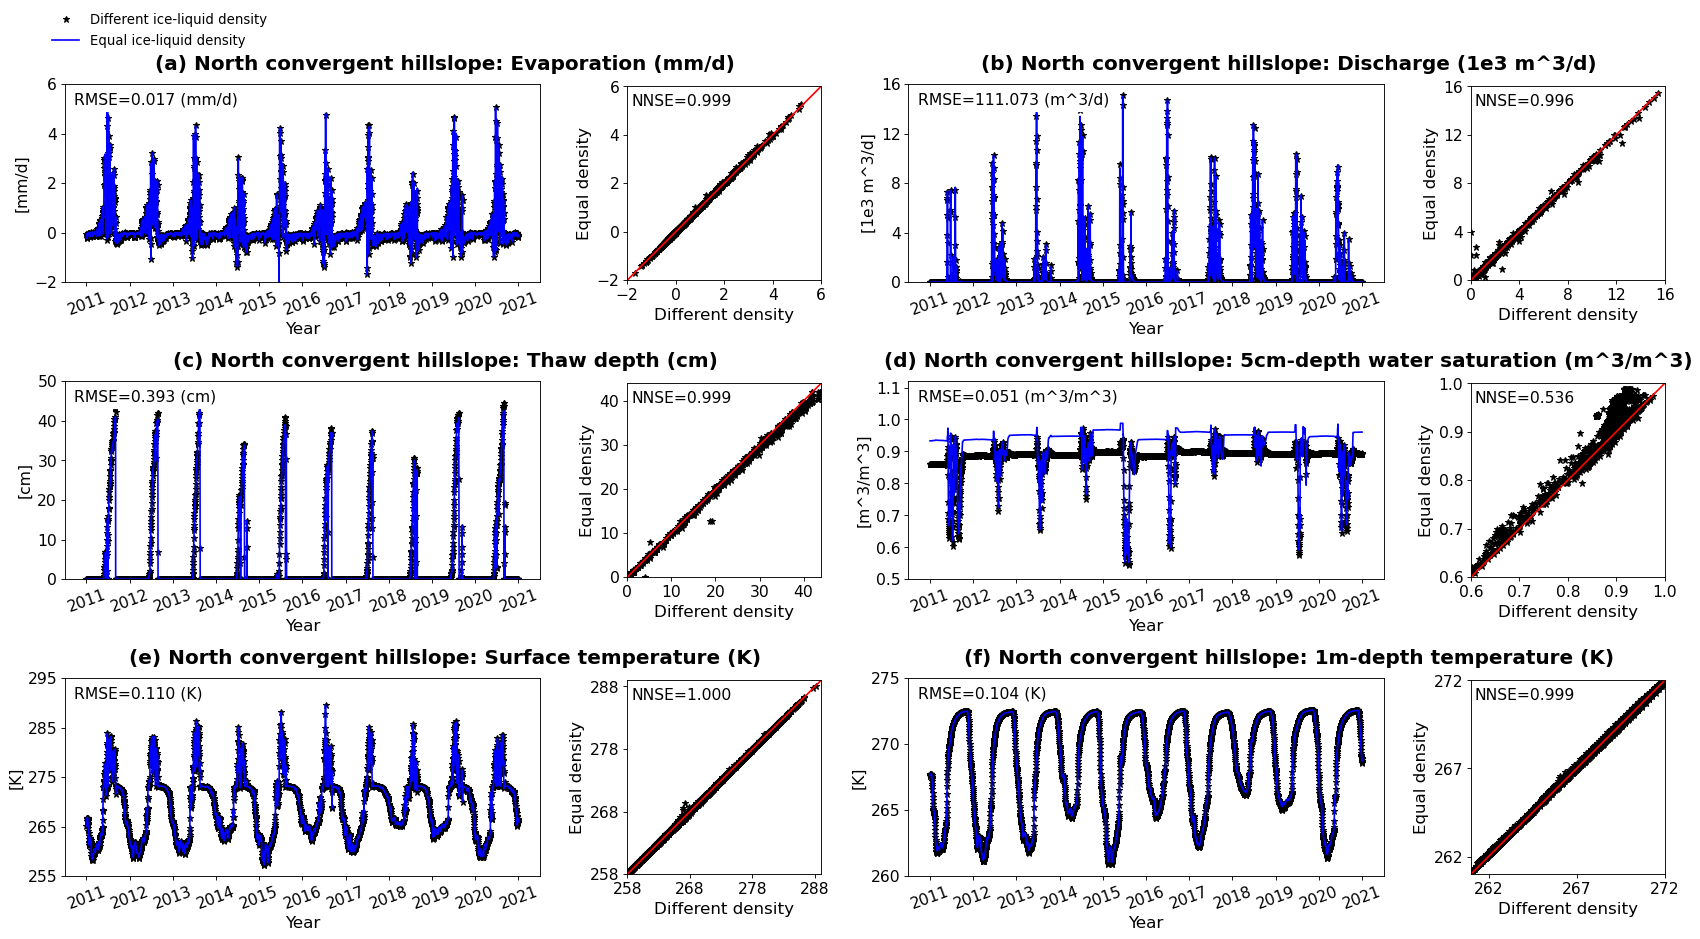

Supplement: Supplementary file 2 [file tc-2021-362-supplement.zip › Supplement/Sag/density_north_convergent_sag.png]

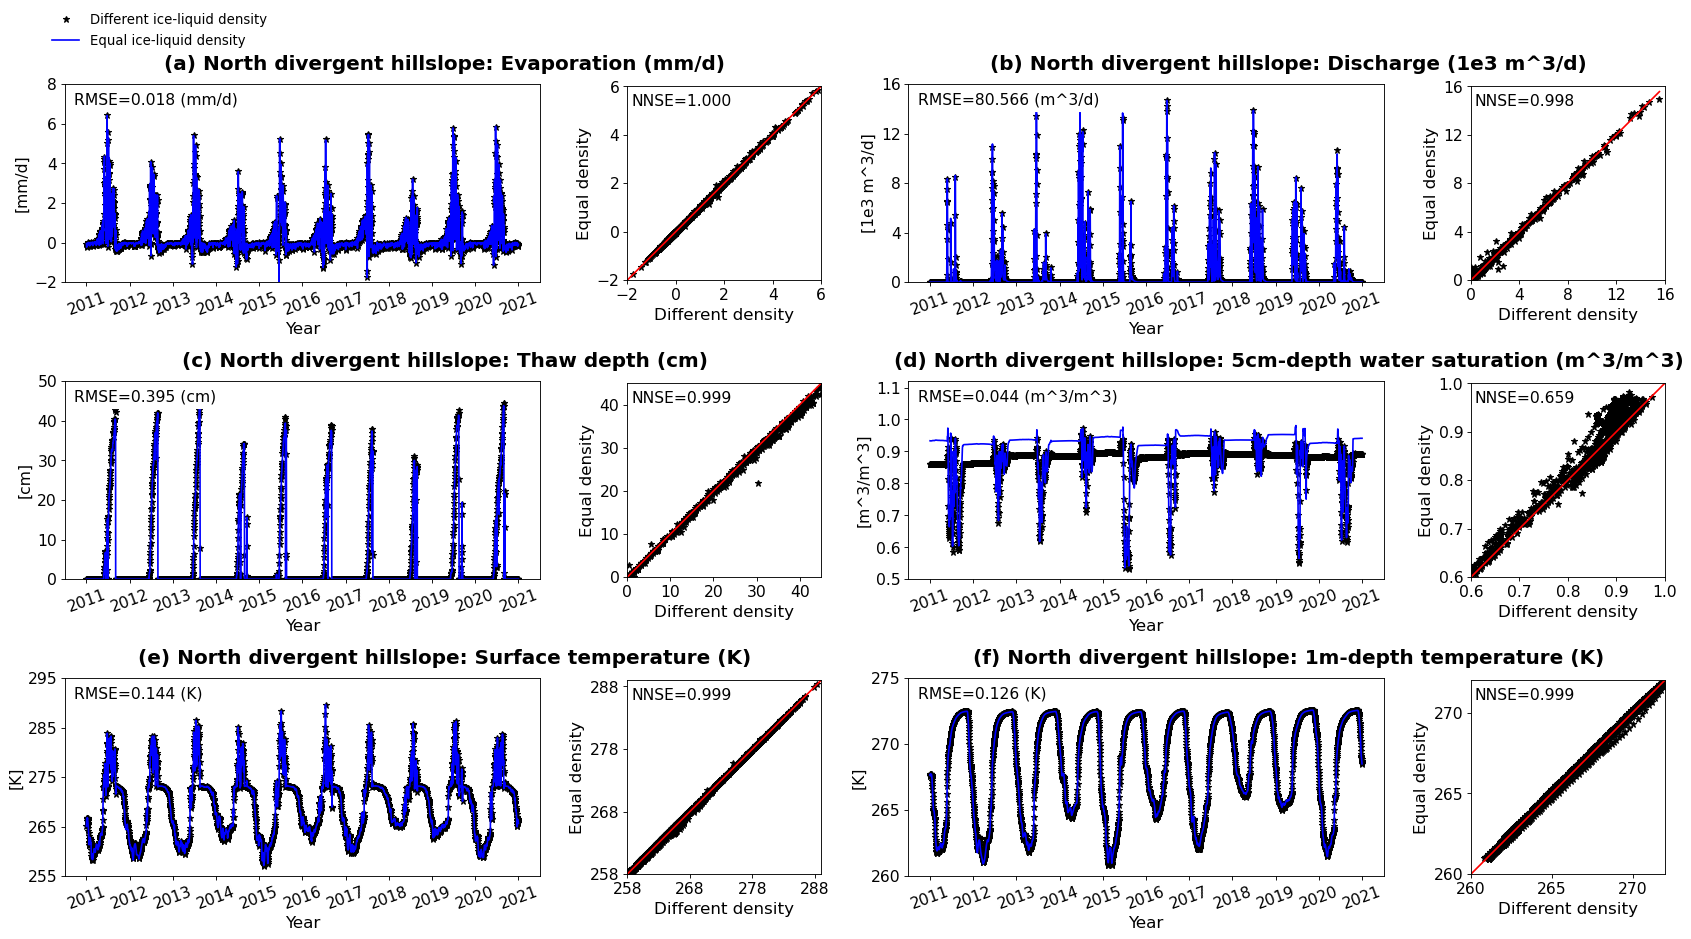

Supplement: Supplementary file 2 [file tc-2021-362-supplement.zip › Supplement/Sag/density_north_divergent_sag.png]

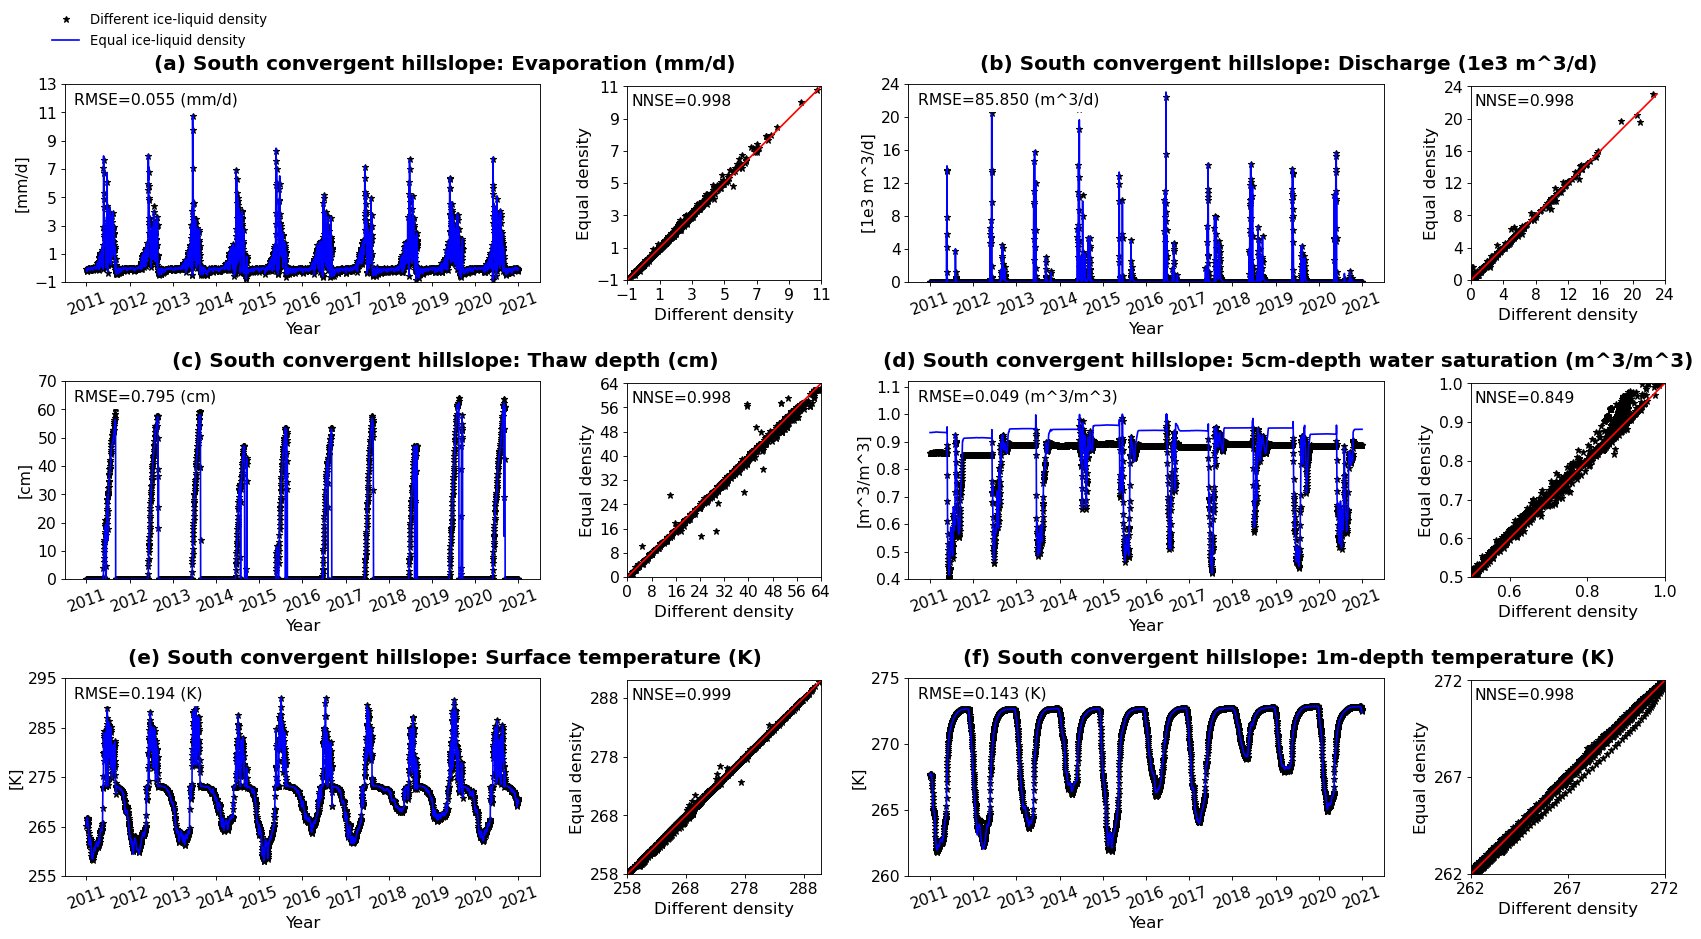

Supplement: Supplementary file 2 [file tc-2021-362-supplement.zip › Supplement/Sag/density_south_convergent_sag.png]

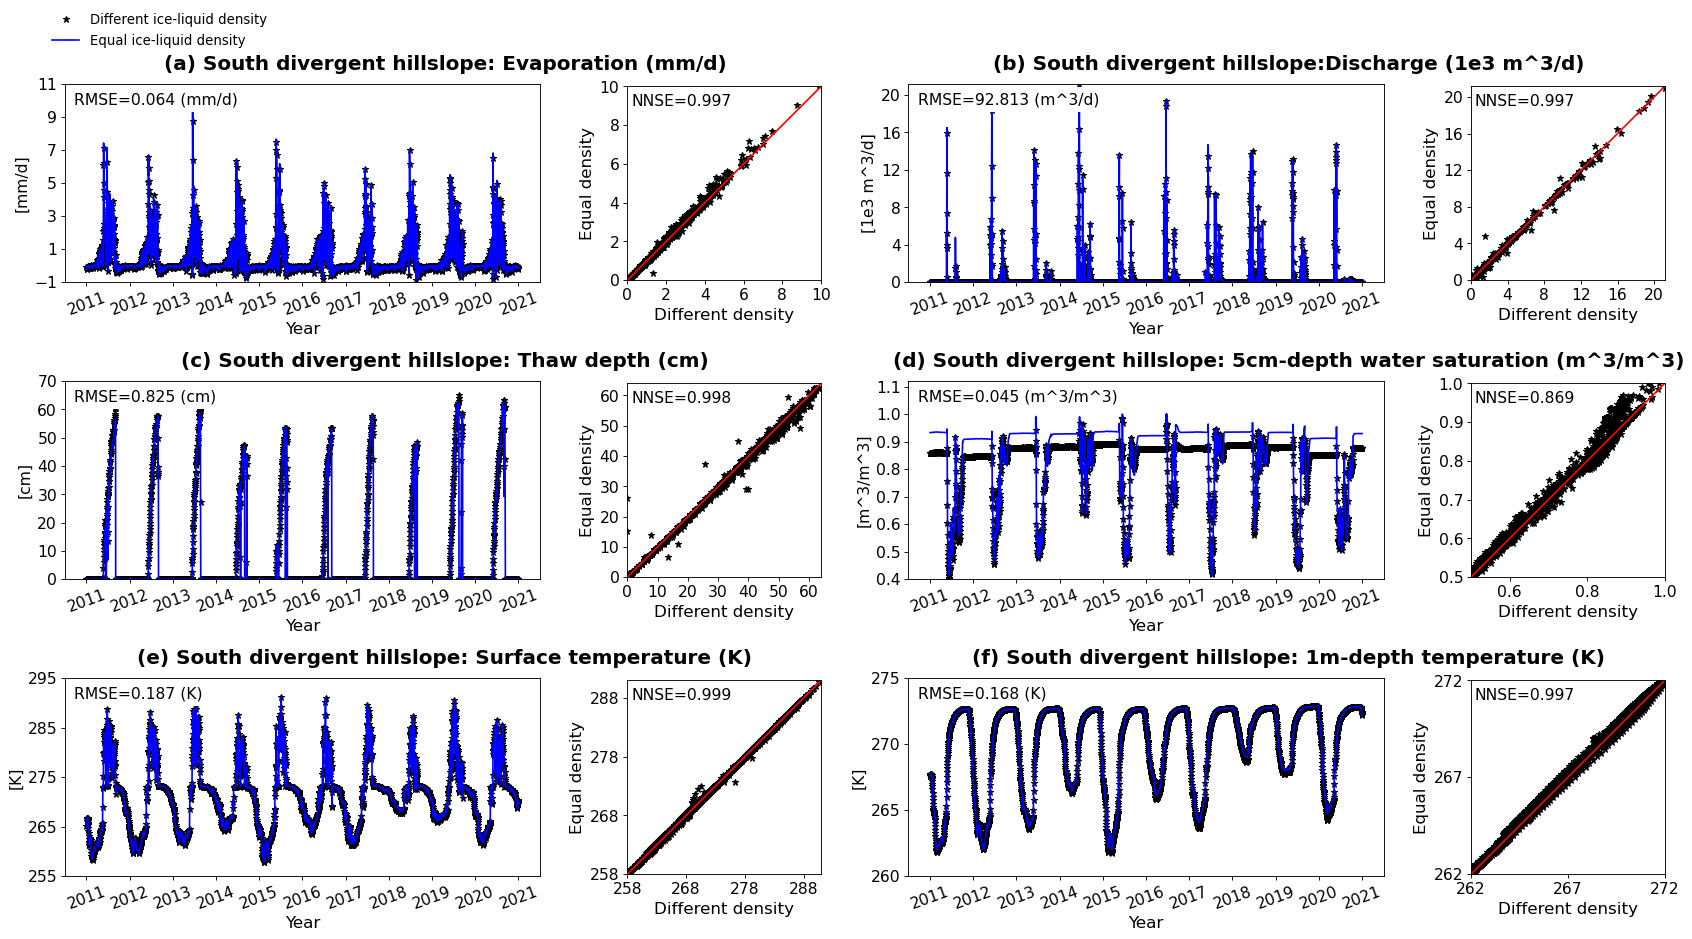

Supplement: Supplementary file 2 [file tc-2021-362-supplement.zip › Supplement/Sag/density_south_divergent_sag.png]

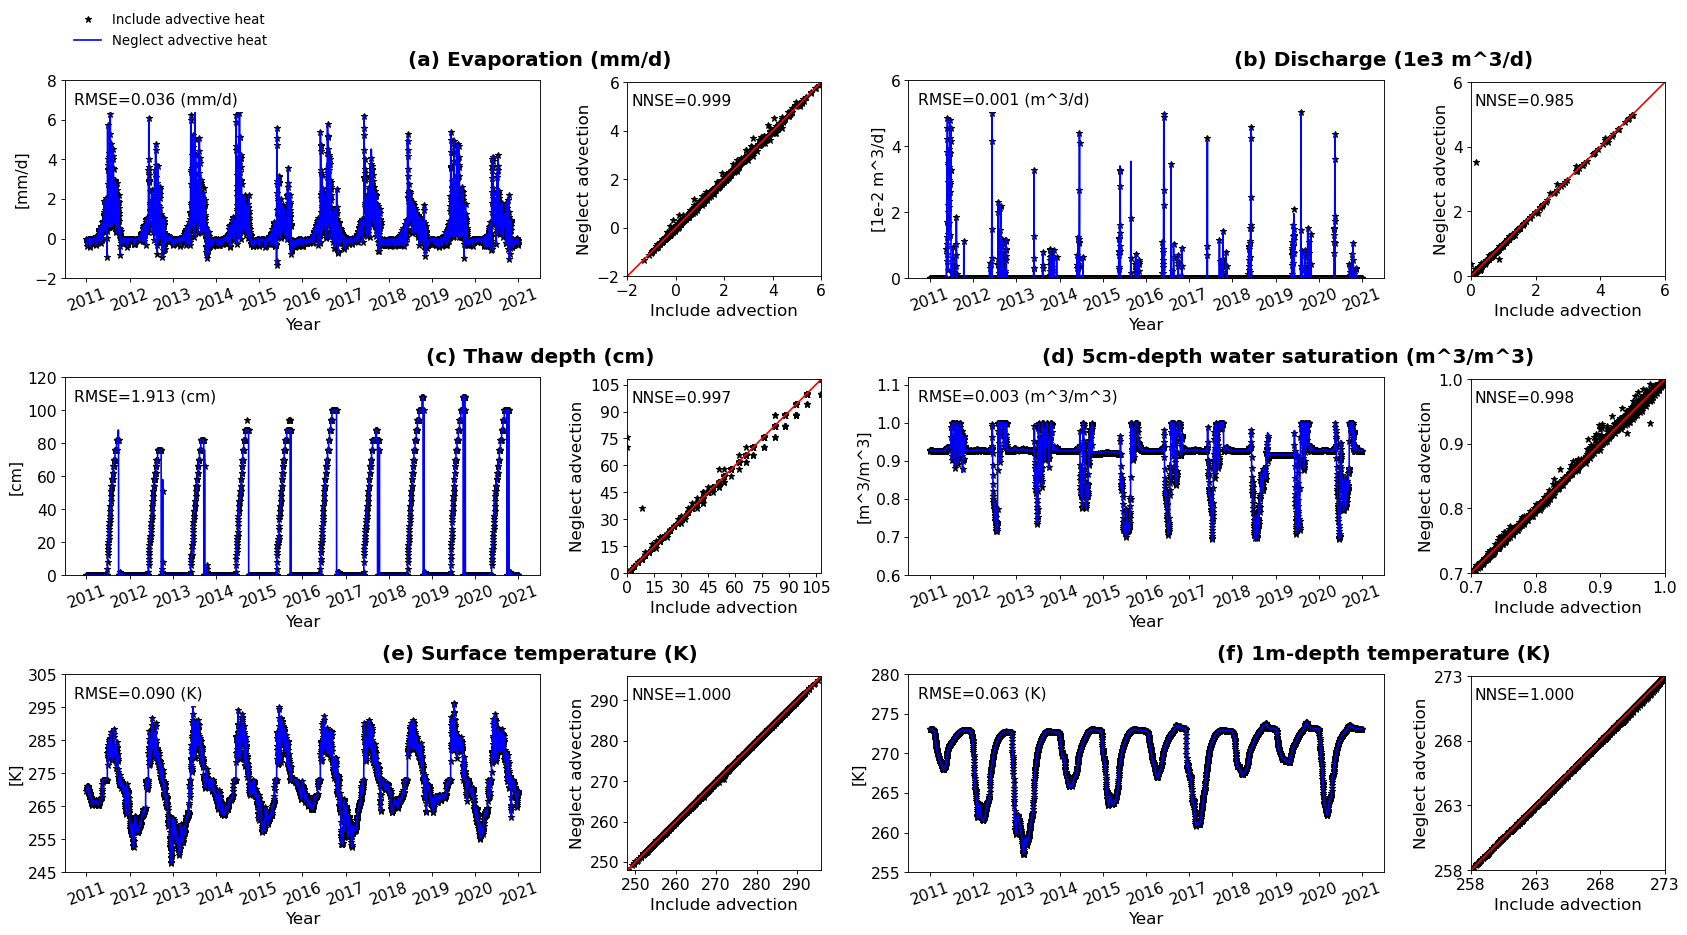

Supplement: Supplementary file 2 [file tc-2021-362-supplement.zip › Supplement/Teller/advection_column_teller.png]

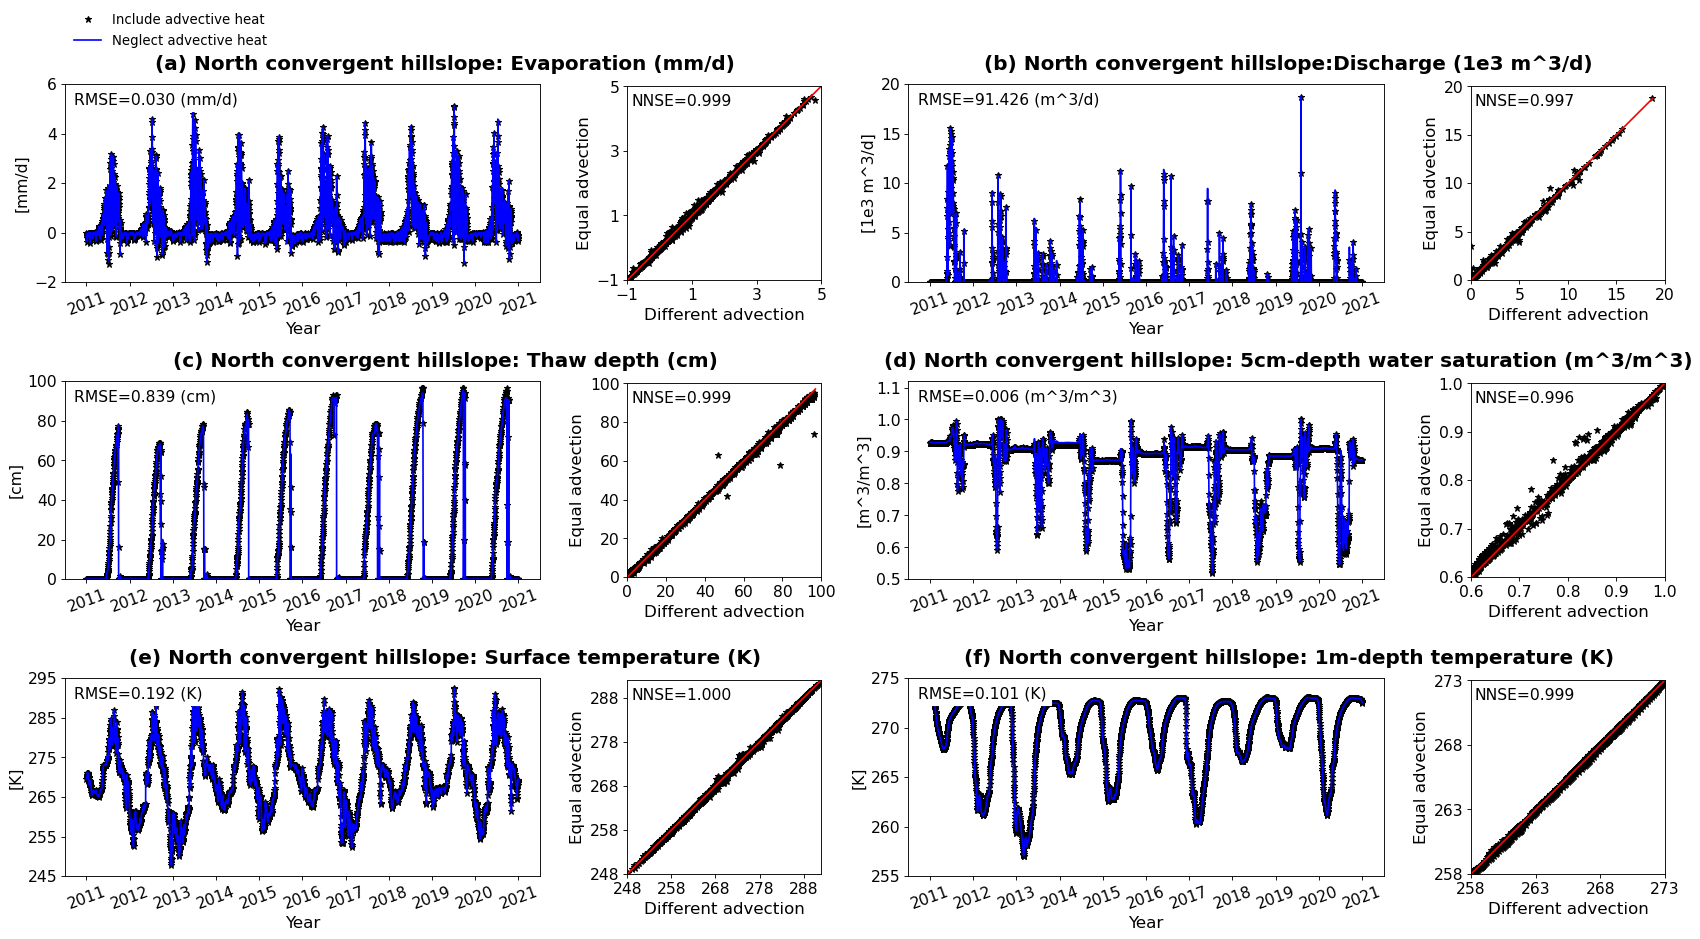

Supplement: Supplementary file 2 [file tc-2021-362-supplement.zip › Supplement/Teller/advection_north_convergent_teller.png]

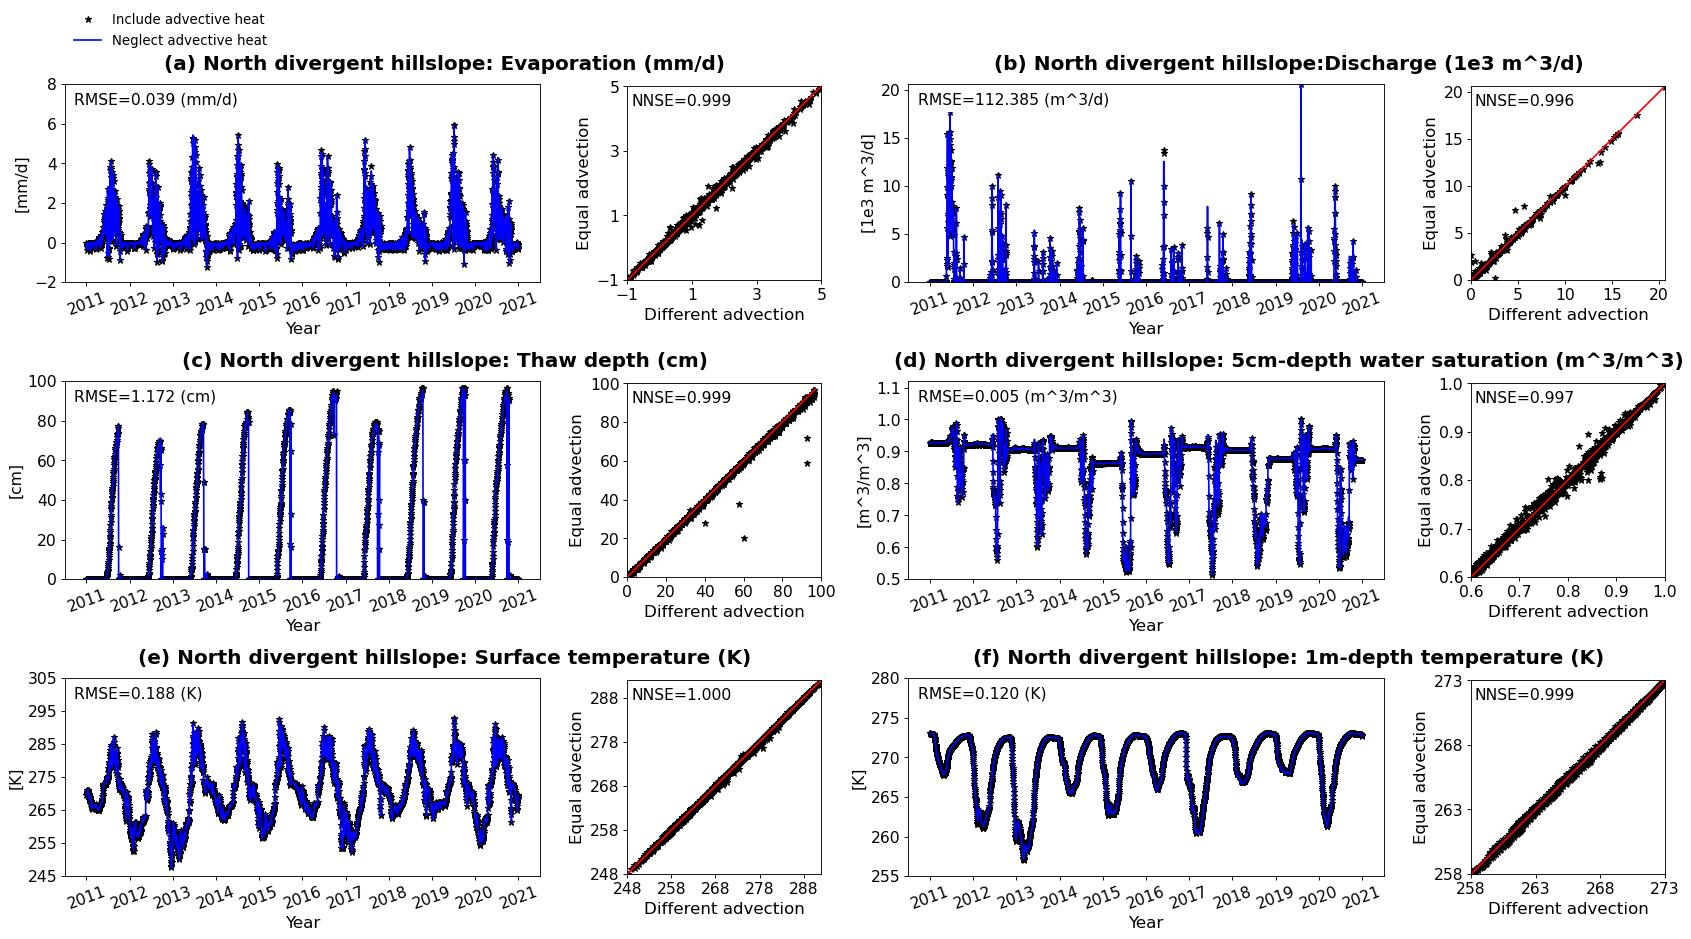

Supplement: Supplementary file 2 [file tc-2021-362-supplement.zip › Supplement/Teller/advection_north_divergent_teller.png]

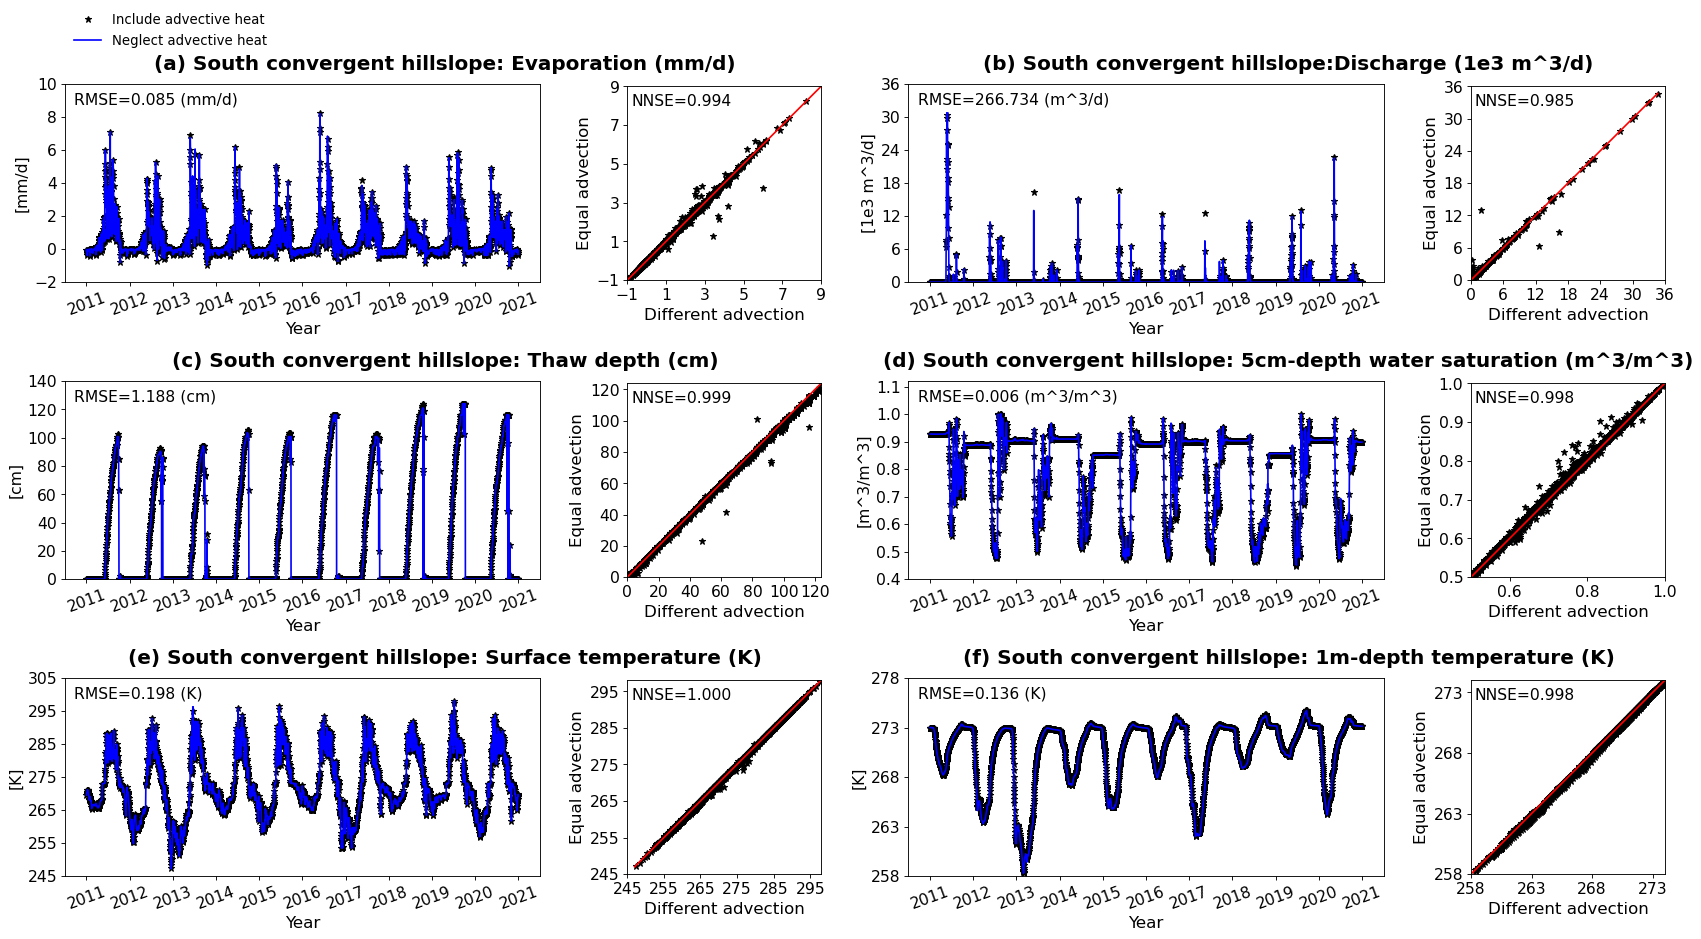

Supplement: Supplementary file 2 [file tc-2021-362-supplement.zip › Supplement/Teller/advection_south_convergent_teller.png]

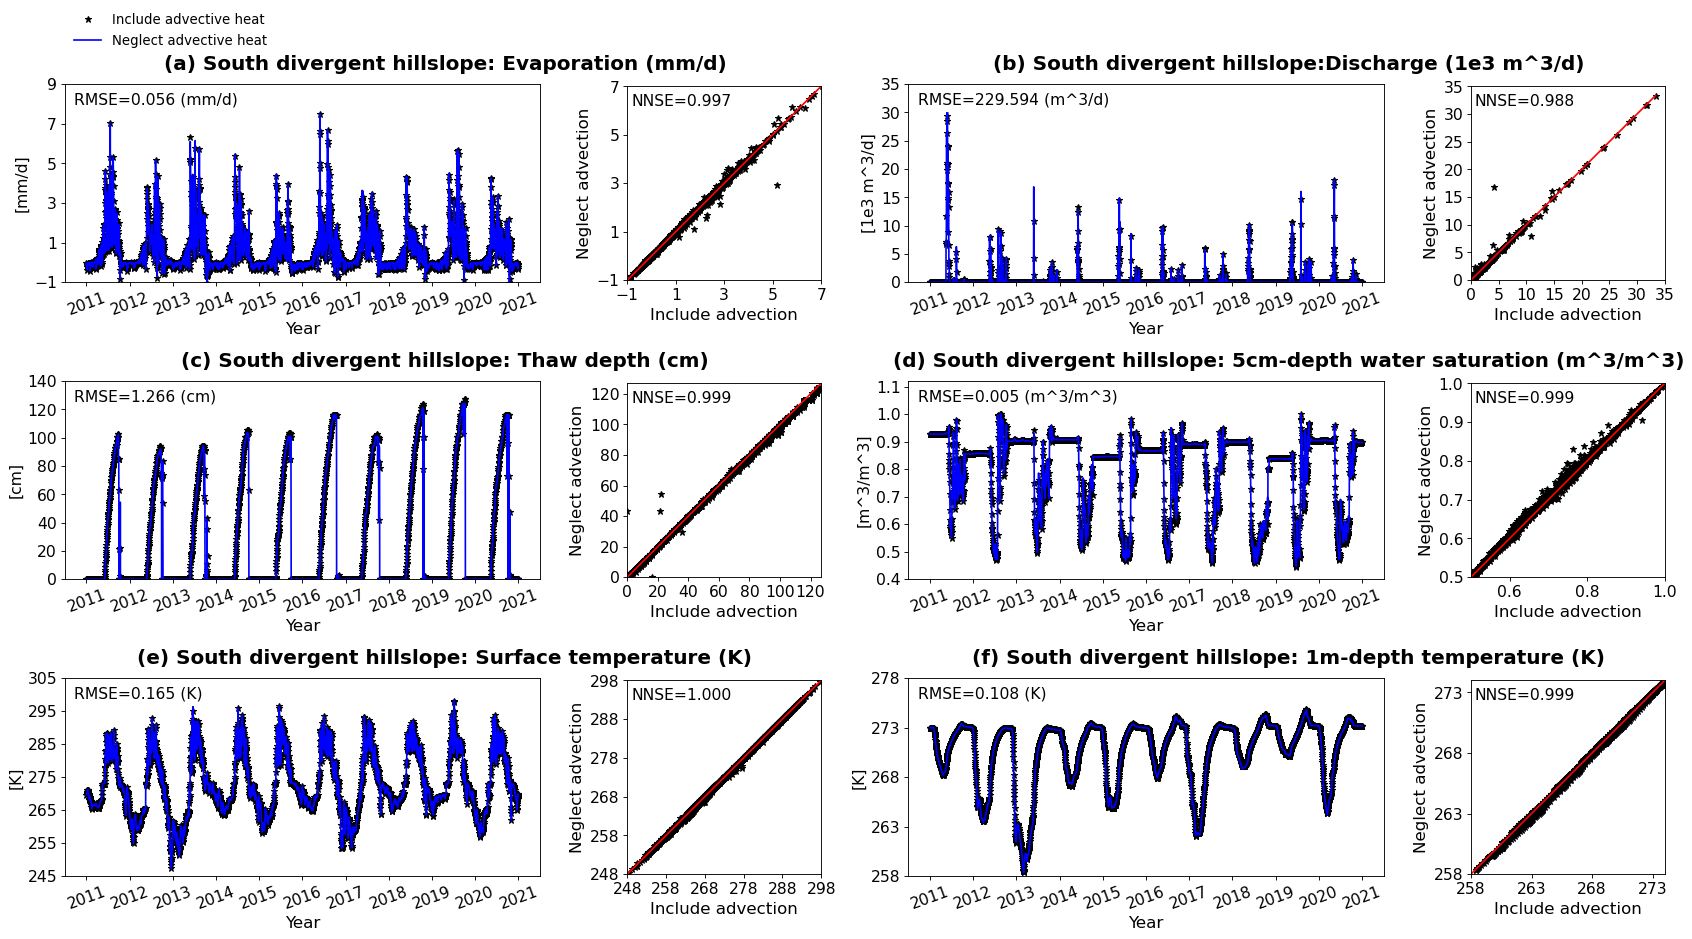

Supplement: Supplementary file 2 [file tc-2021-362-supplement.zip › Supplement/Teller/advection_south_divergent_teller.png]

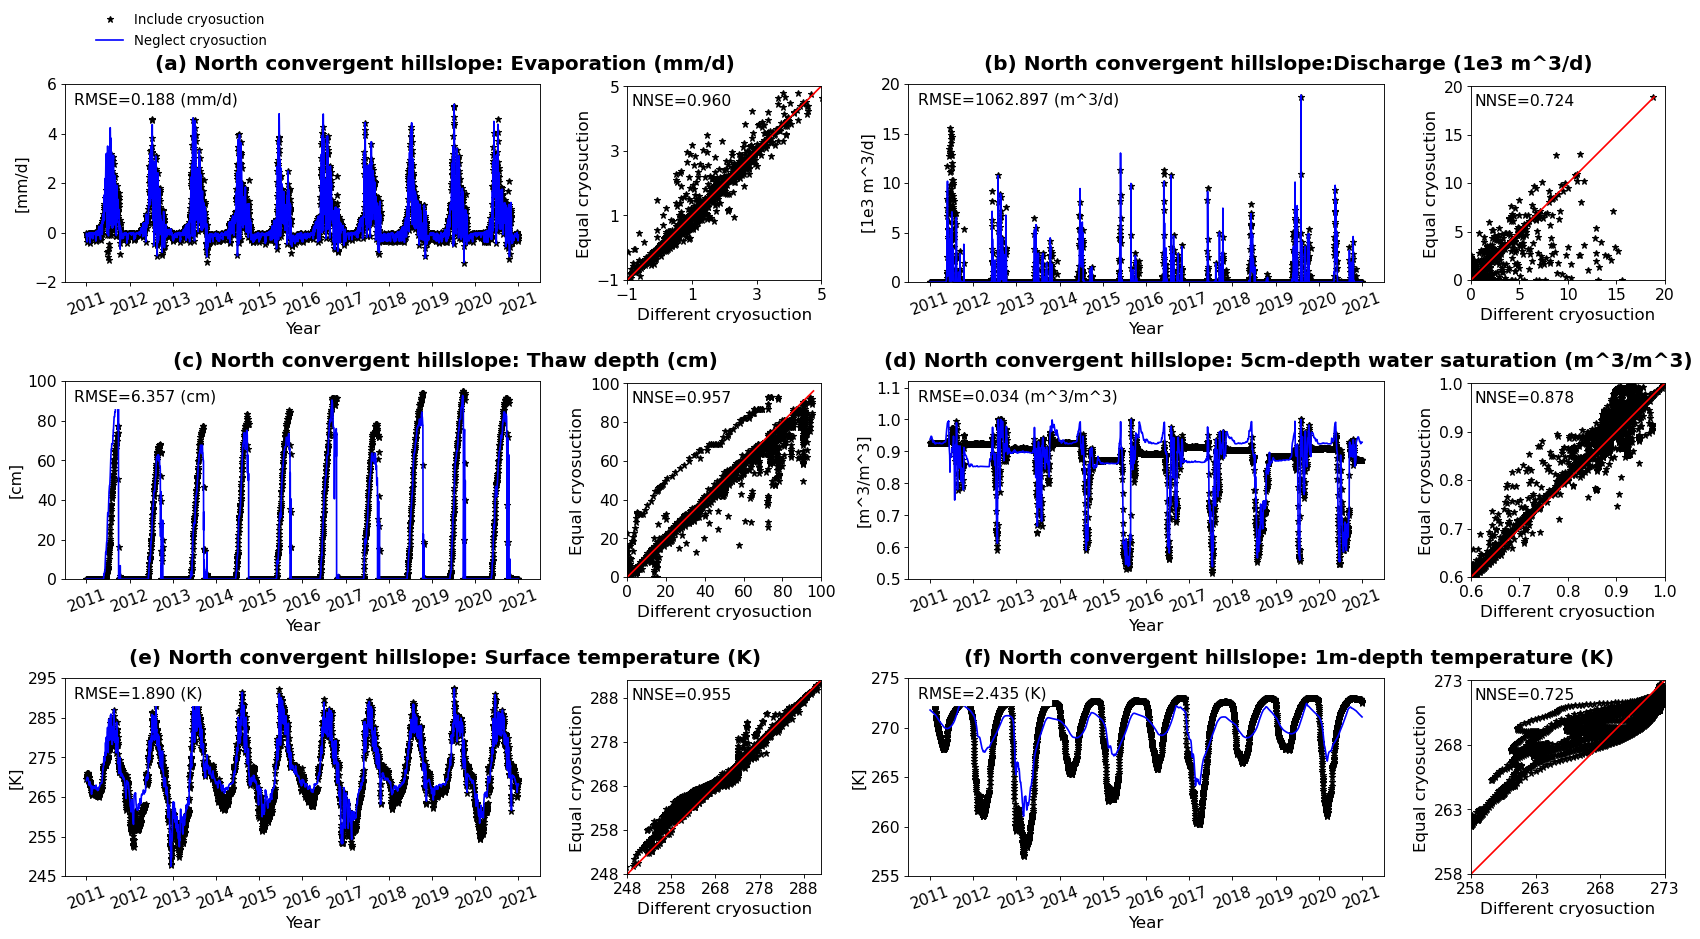

Supplement: Supplementary file 2 [file tc-2021-362-supplement.zip › Supplement/Teller/cryosuction_north_convergent_teller.png]

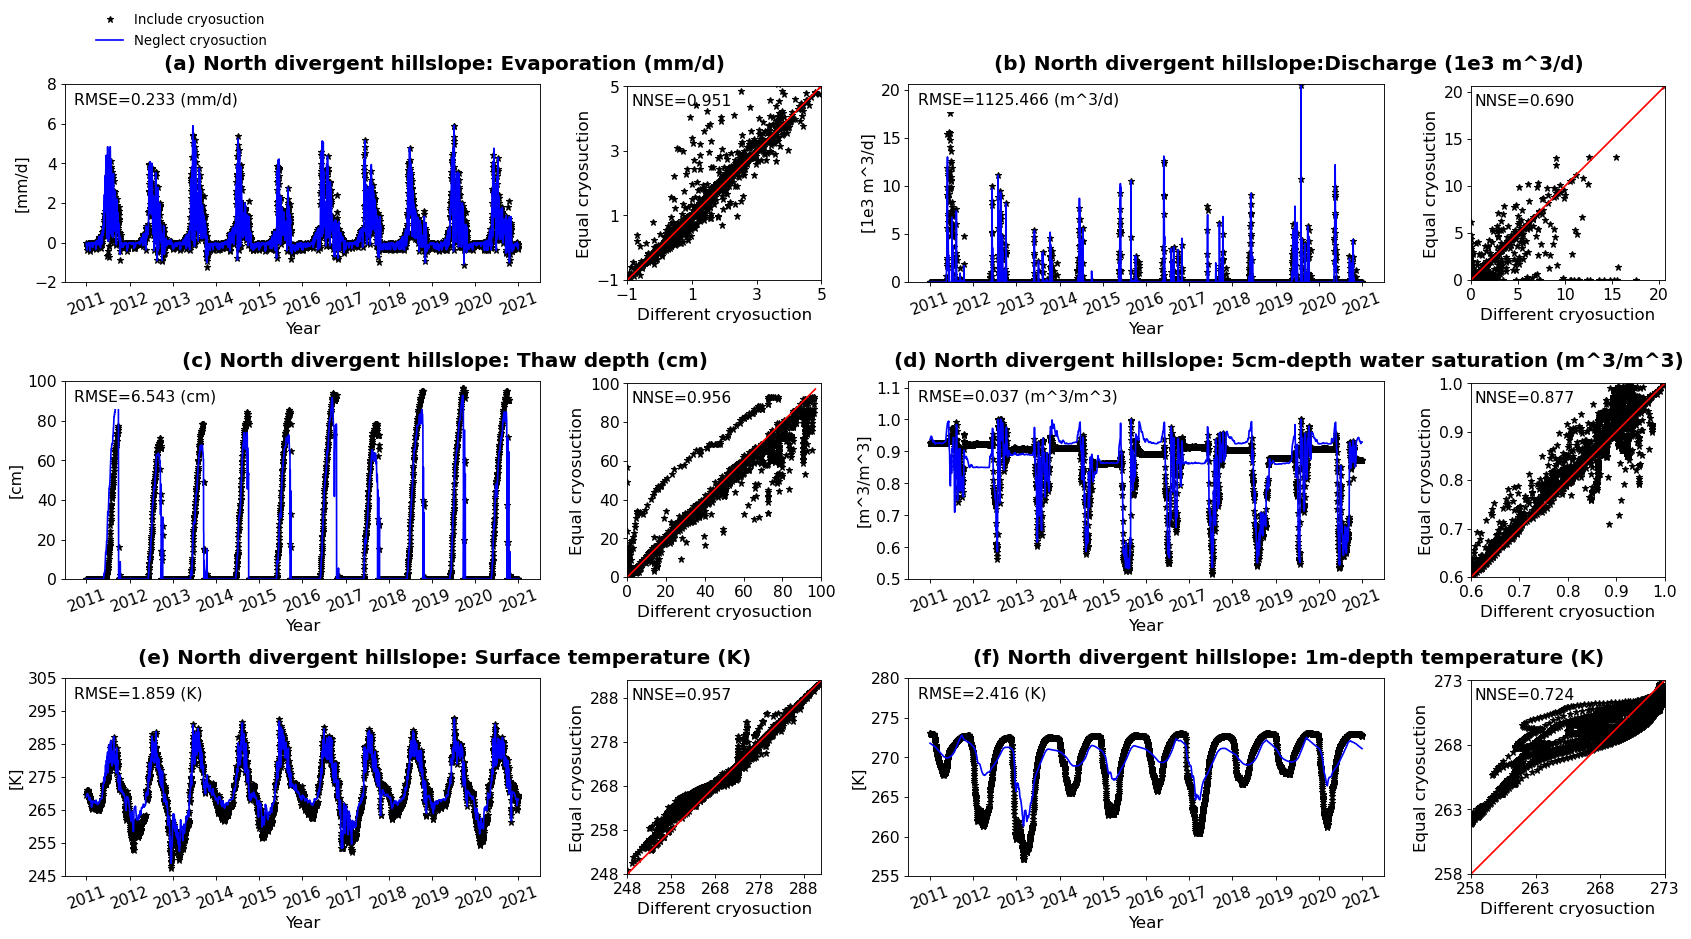

Supplement: Supplementary file 2 [file tc-2021-362-supplement.zip › Supplement/Teller/cryosuction_north_divergent_teller.png]

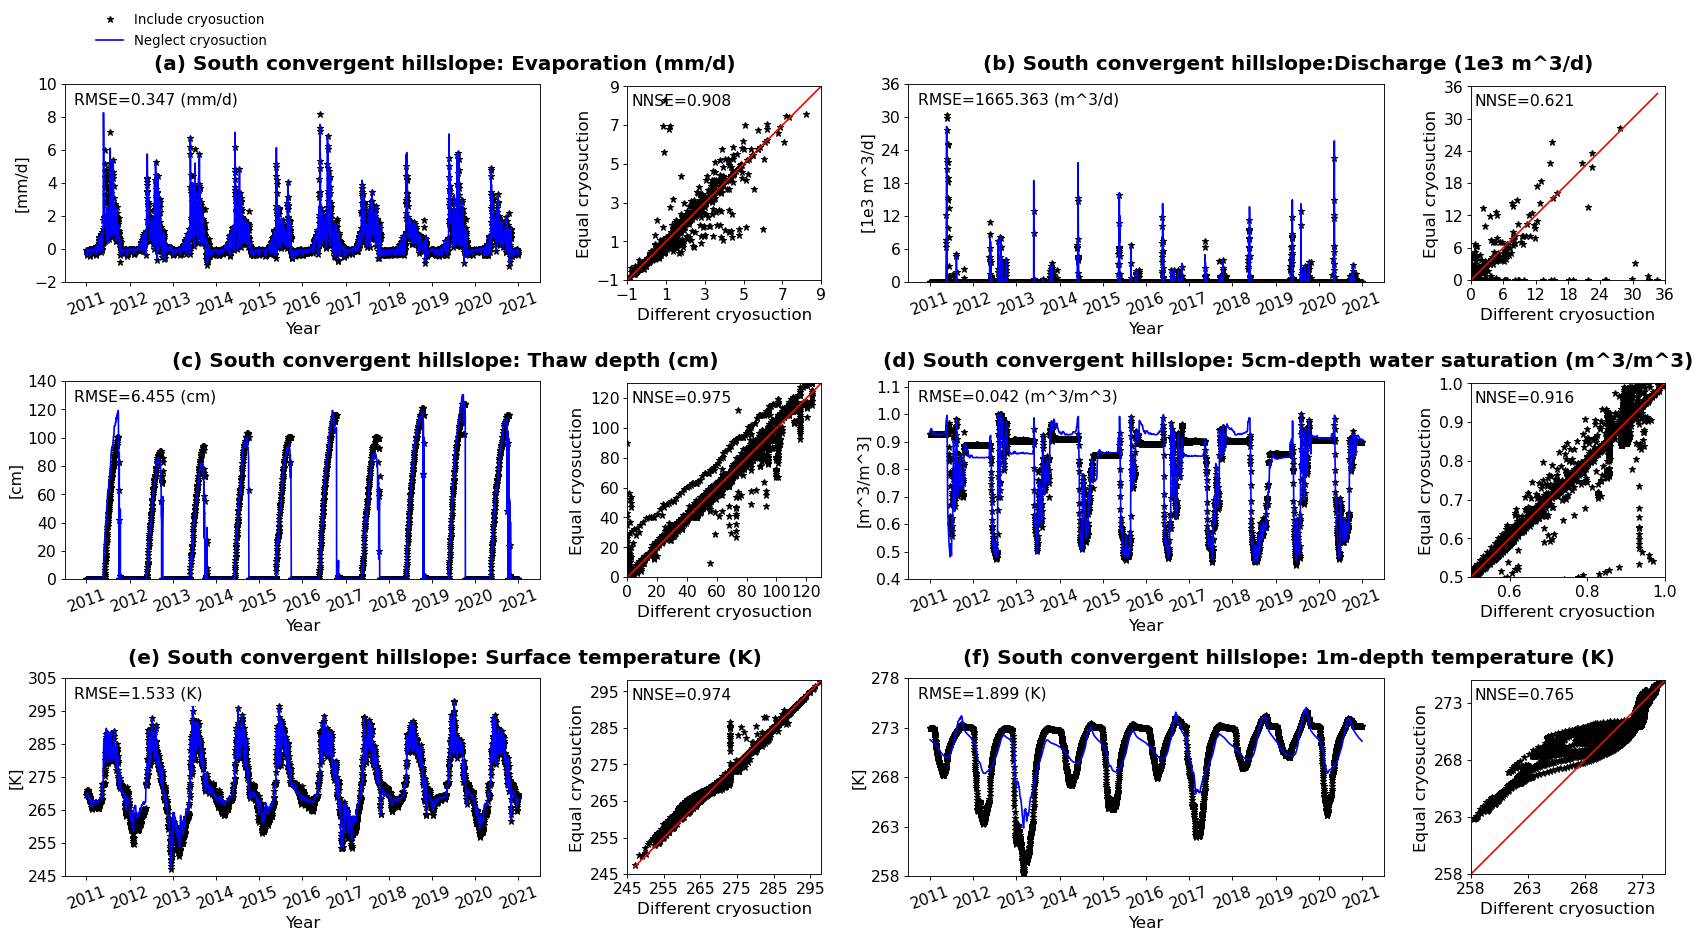

Supplement: Supplementary file 2 [file tc-2021-362-supplement.zip › Supplement/Teller/cryosuction_south_convergent_teller.png]

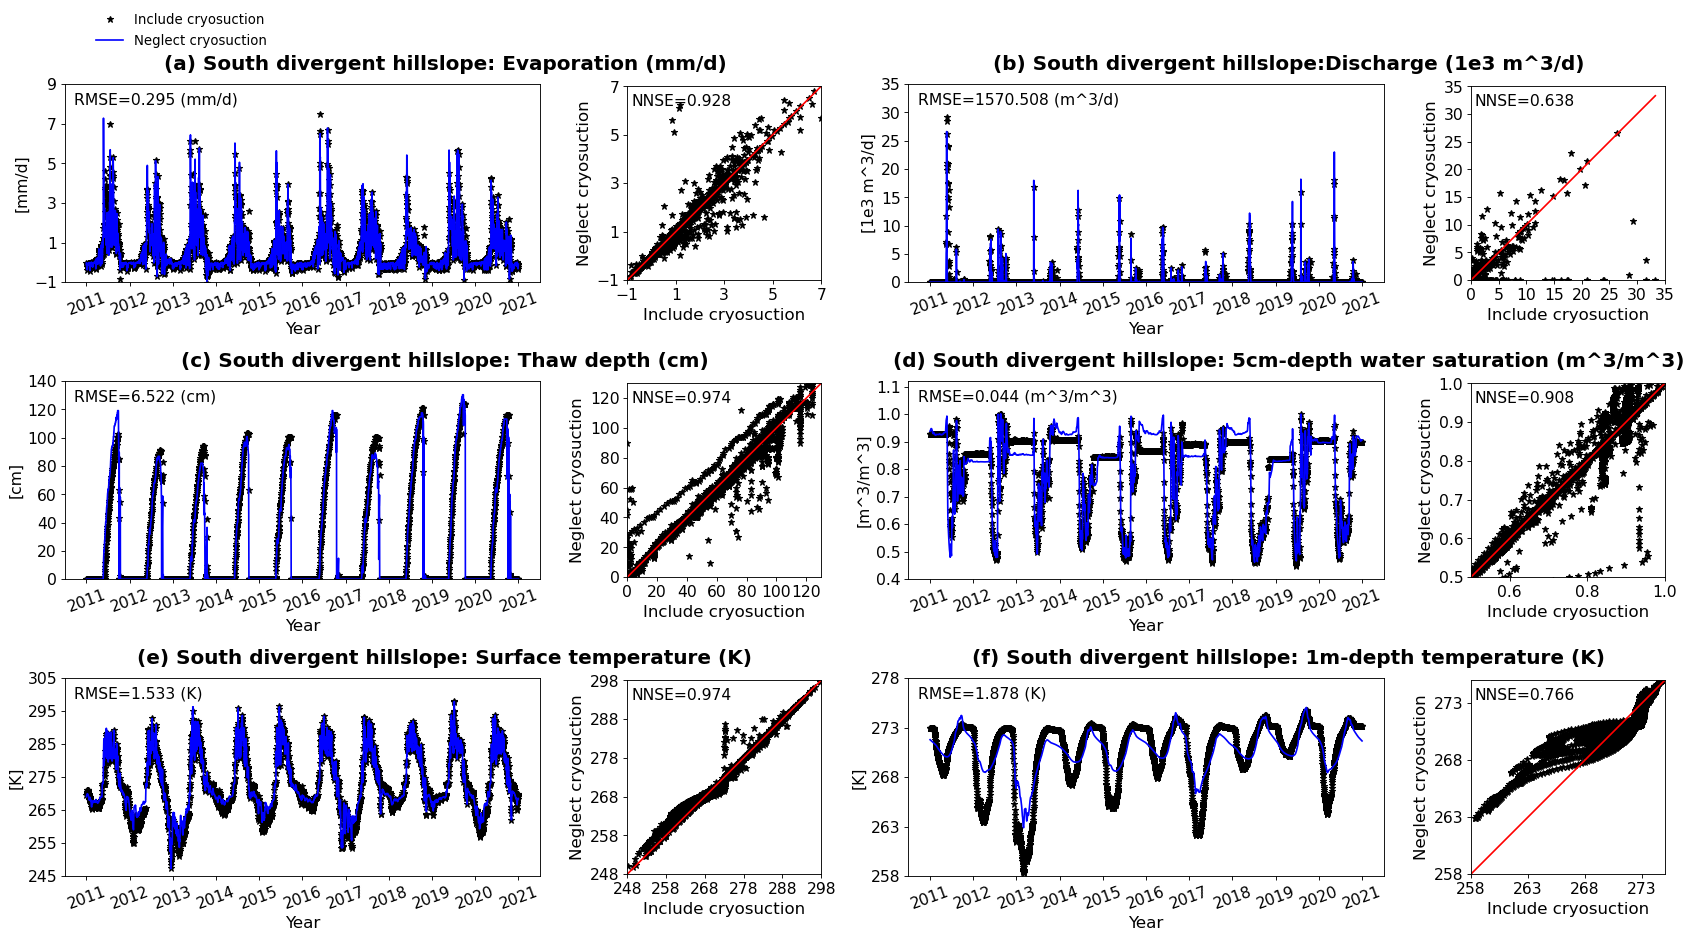

Supplement: Supplementary file 2 [file tc-2021-362-supplement.zip › Supplement/Teller/cryosuction_south_divergent_teller.png]

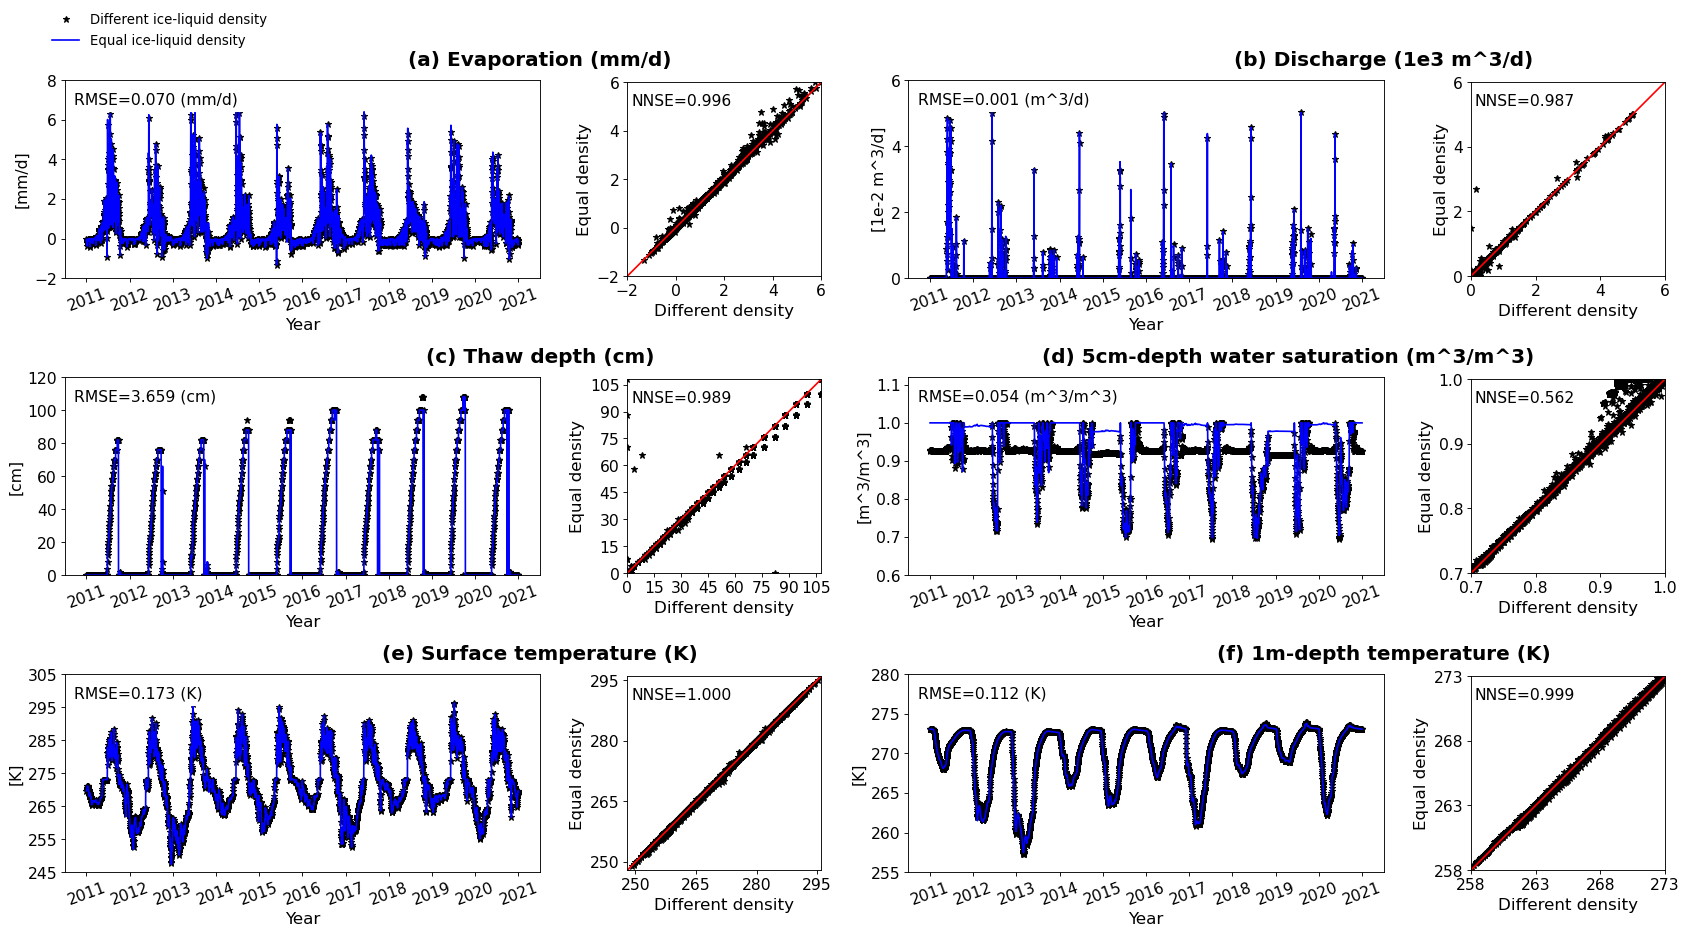

Supplement: Supplementary file 2 [file tc-2021-362-supplement.zip › Supplement/Teller/density_column_teller.png]

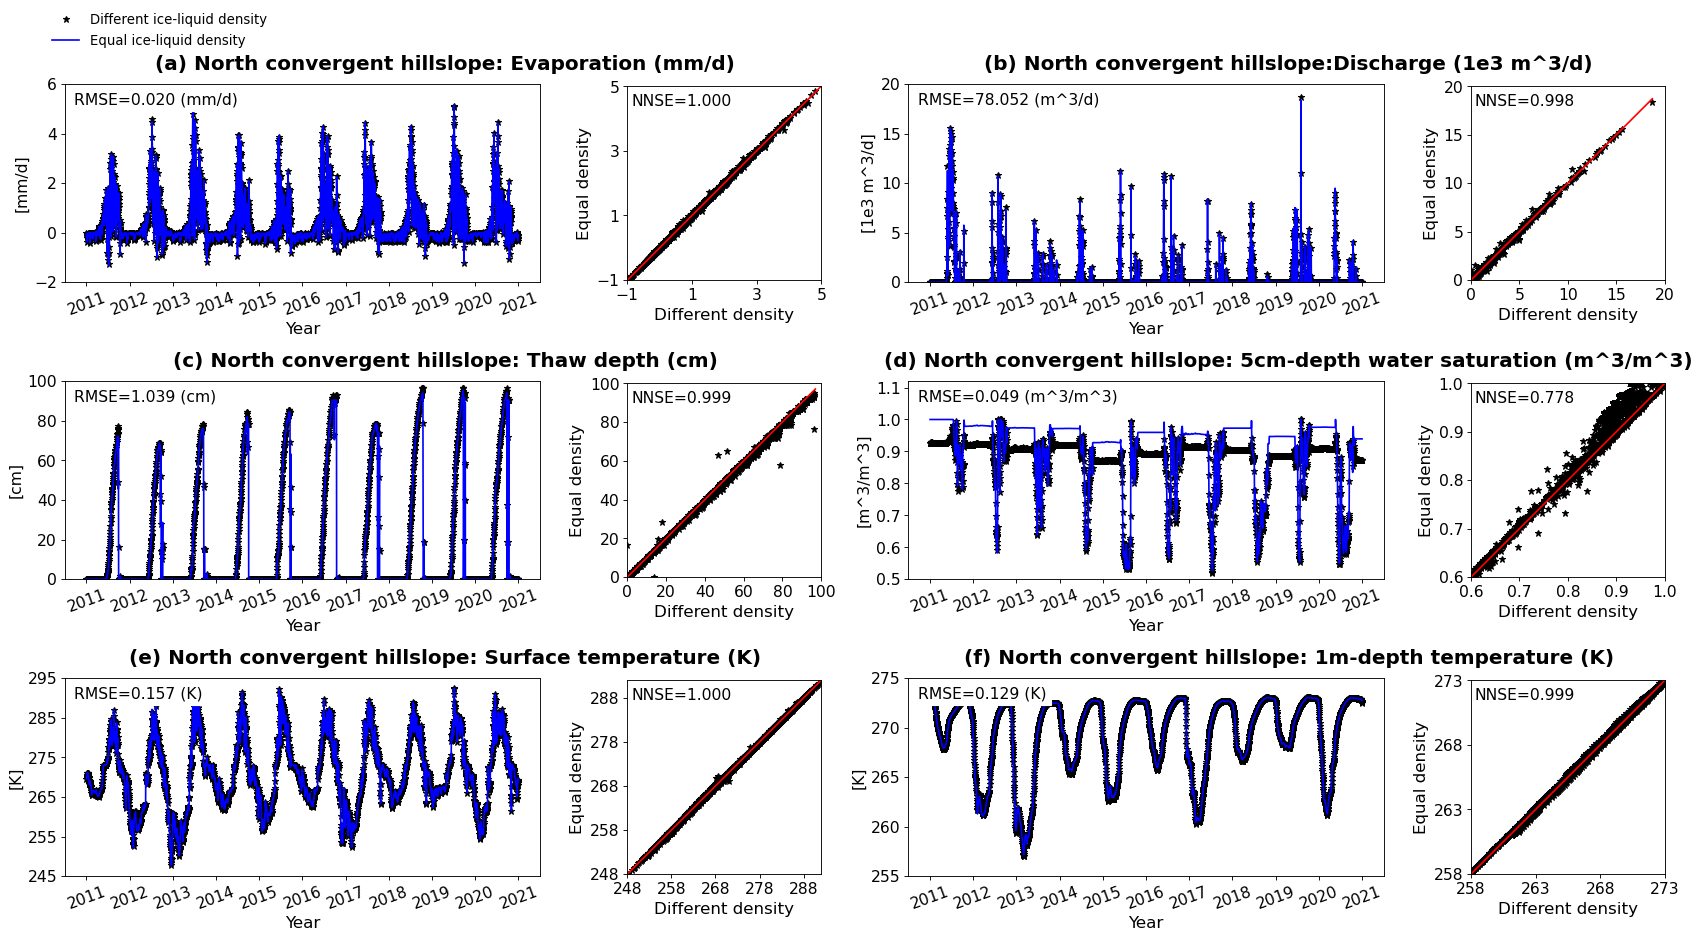

Supplement: Supplementary file 2 [file tc-2021-362-supplement.zip › Supplement/Teller/density_north_convergent_teller.png]

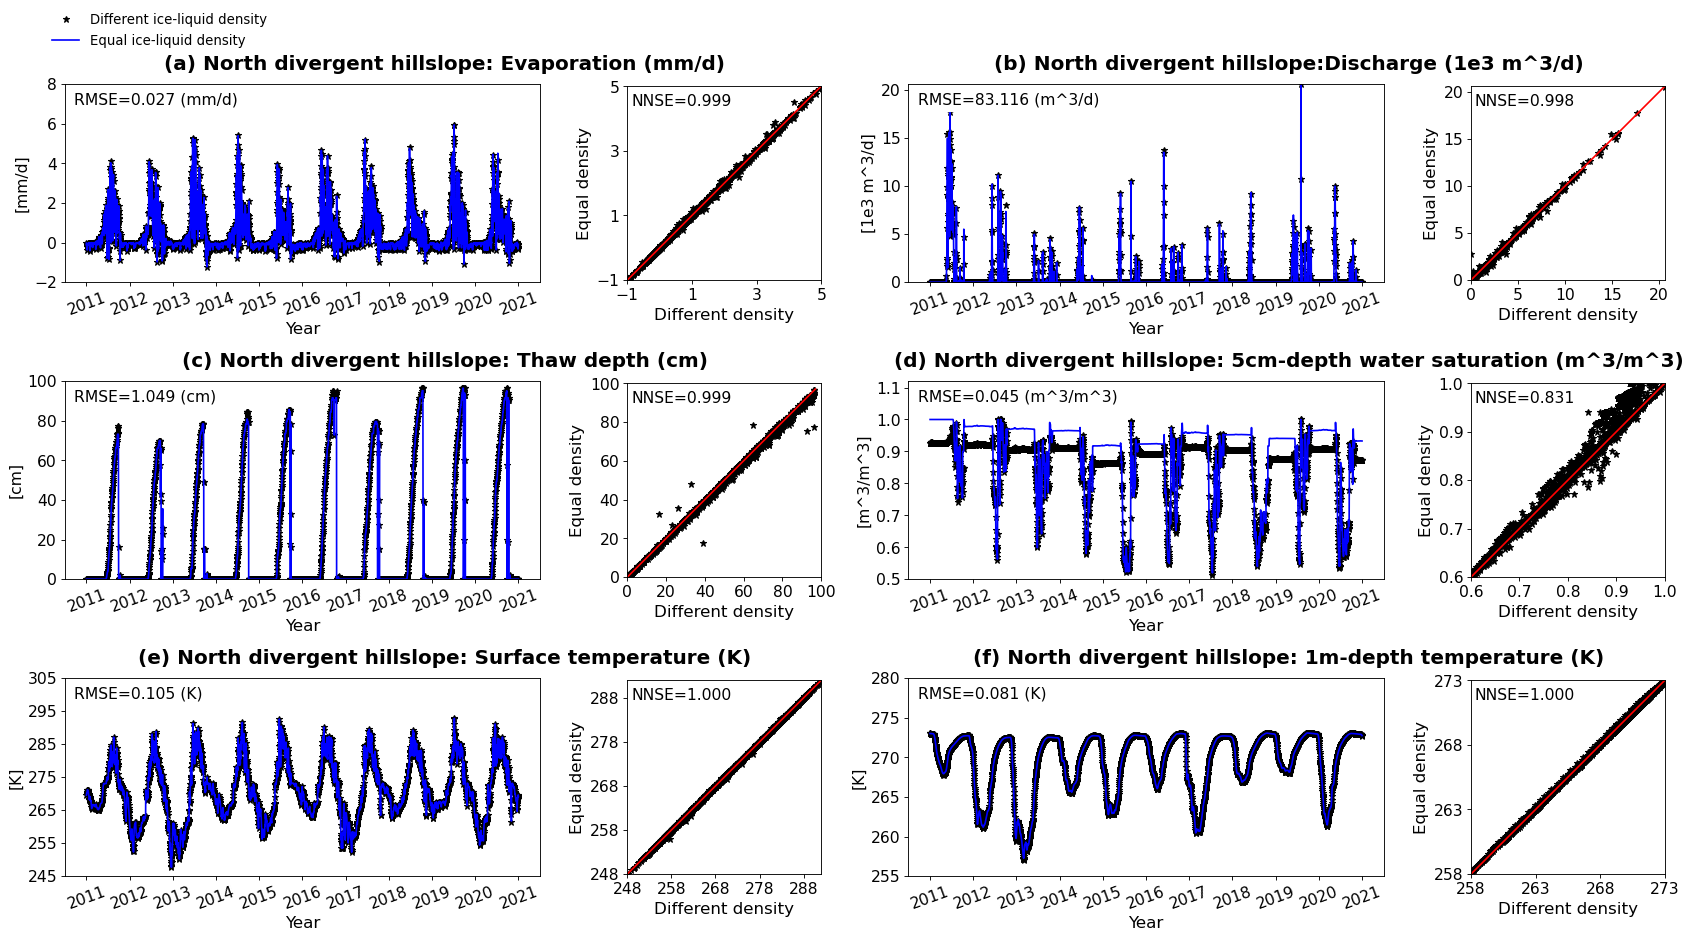

Supplement: Supplementary file 2 [file tc-2021-362-supplement.zip › Supplement/Teller/density_north_divergent_teller.png]

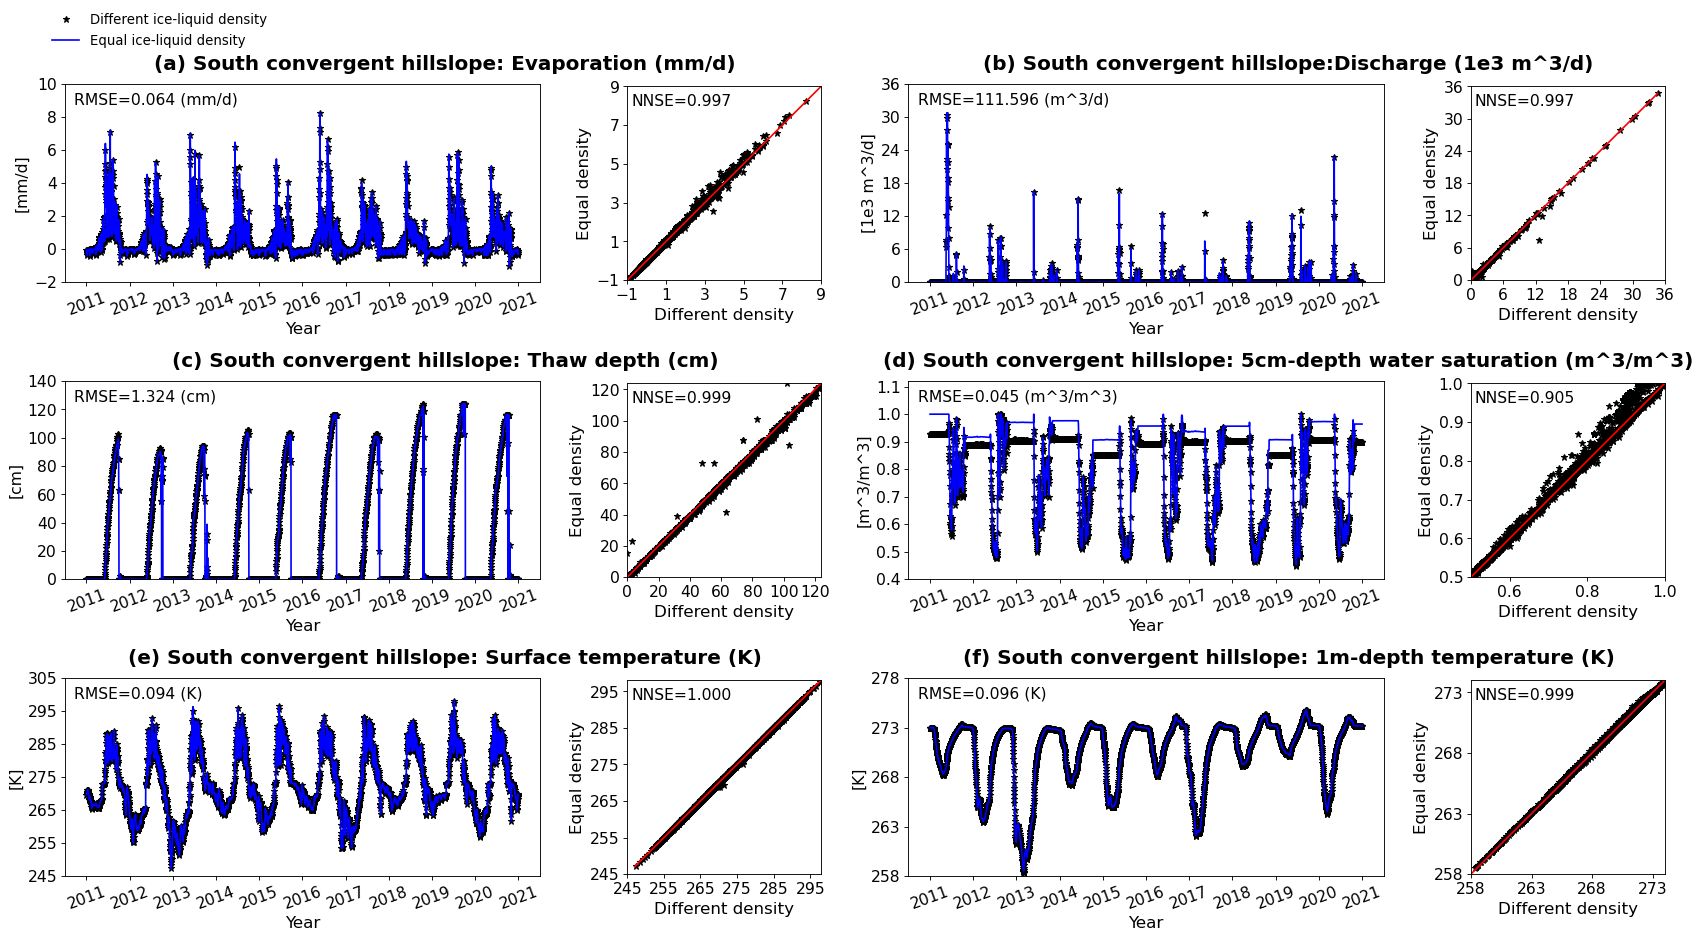

Supplement: Supplementary file 2 [file tc-2021-362-supplement.zip › Supplement/Teller/density_south_convergent_teller.png]

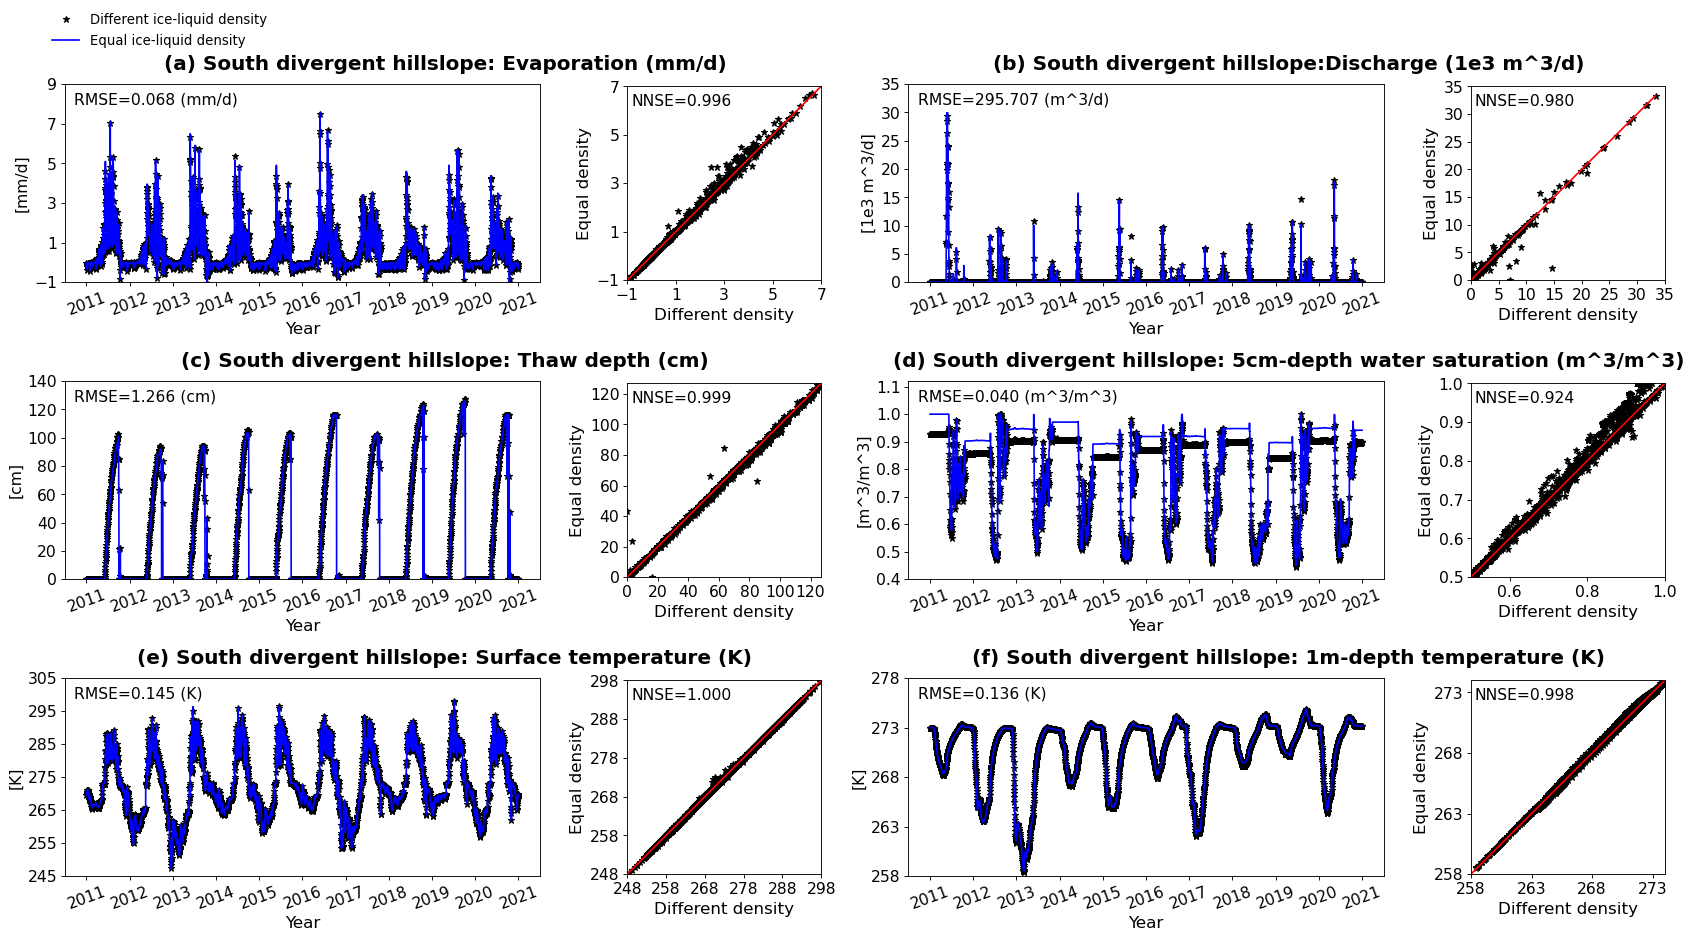

Supplement: Supplementary file 2 [file tc-2021-362-supplement.zip › Supplement/Teller/density_south_divergent_teller.png]
